# Supplementary material for: Protocol for the evaluation of a pilot implementation of essential interventions for the prevention of cardiovascular diseases in primary healthcare in the Republic of Moldova
Source: PubMed Central journal article supplement (PMC6615880; doi:10.1136/bmjopen-2018-025705), 2019-07-04
Supplement: bmjopen-2018-025705.draft_revisions.pdf [file bmjopen-2018-025705.draft_revisions.pdf]

# BMJ Open

BMJ Open is committed to open peer review. As part of this commitment we make the peer review history of every article we publish publicly available.

When an article is published we post the peer reviewers' comments and the authors' responses online. We also post the versions of the paper that were used during peer review. These are the versions that the peer review comments apply to.

The versions of the paper that follow are the versions that were submitted during the peer review process. They are not the versions of record or the final published versions. They should not be cited or distributed as the published version of this manuscript.

BMJ Open is an open access journal and the full, final, typeset and author-corrected version of record of the manuscript is available on our site with no access controls, subscription charges or pay-per-view fees (<http://bmjopen.bmj.com>).

If you have any questions on BMJ Open's open peer review process please email [info.bmjopen@bmj.com](mailto:info.bmjopen@bmj.com)

# BMJ Open

## Protocol for the Evaluation of a Pilot Implementation of Essential Interventions for the Prevention of Cardiovascular Diseases in Primary Health Care in the Republic of Moldova

|                               |                                                                                                                                                                                                                                                                               |
|-------------------------------|-------------------------------------------------------------------------------------------------------------------------------------------------------------------------------------------------------------------------------------------------------------------------------|
| Journal:                      | <i>BMJ Open</i>                                                                                                                                                                                                                                                               |
| Manuscript ID                 | bmjopen-2018-025705                                                                                                                                                                                                                                                           |
| Article Type:                 | Protocol                                                                                                                                                                                                                                                                      |
| Date Submitted by the Author: | 01-Aug-2018                                                                                                                                                                                                                                                                   |
| Complete List of Authors:     | Collins, Dylan; University of British Columbia,<br>Ciobanu, Angela<br>Laatikainen, Tiina; National Institute for Health and Welfare, Epidemiology<br>and Health Promotion<br>Curocichin, Ghenadie<br>Salaru, Virginia<br>Zatic, Tatiana<br>Anisei, Angela<br>Farrington, Jill |
| Keywords:                     | Cardiology < INTERNAL MEDICINE, PRIMARY CARE, Quality in health care<br>< HEALTH SERVICES ADMINISTRATION & MANAGEMENT, Protocols &<br>guidelines < HEALTH SERVICES ADMINISTRATION & MANAGEMENT                                                                                |
|                               |                                                                                                                                                                                                                                                                               |

SCHOLARONE™  
Manuscripts

1  
2  
3 **1 Protocol for the Evaluation of a Pilot Implementation of Essential Interventions for the**  
4 **2 Prevention of Cardiovascular Diseases in Primary Health Care in the Republic of Moldova**  
5  
6  
7

8 5 Dylan R. J. Collins<sup>1</sup>, Angela Ciobanu<sup>2</sup>, Tiina Laatikainen<sup>3</sup>, Ghenadie Curocichin<sup>4</sup>, Virginia  
9 6 Salaru<sup>4</sup>, Tatiana Zatic<sup>5</sup>, Angela Anisei<sup>6</sup>, Jill L. Farrington<sup>7</sup>  
10 7  
11 8

12 9 <sup>1</sup>University of British Columbia, Vancouver, Canada

13 10 <sup>2</sup>World Health Organization Country Office in Republic of Moldova, Chisinau, Republic of  
14 11 Moldova

15 12 <sup>3</sup>Institute of Public Health and Clinical Nutrition, Helsinki, Finland

16 13 <sup>4</sup>Family Medicine Department, Nicolae Testemitanu State Medical and Pharmaceutical  
17 14 University, Chisinau, Republic of Moldova

18 15 <sup>5</sup>Primary, Emergency and Community Health Policies Department, Ministry of Health, Labour  
19 16 and Social Protection, Chisinau, Republic of Moldova

20 17 <sup>6</sup>Department on Quality Management of Health Services, National Public Health Agency,  
21 18 Republic of Moldova

22 19 <sup>7</sup>World Health Organization Regional Office for Europe, Copenhagen, Denmark  
23 20  
24 21

25 22  
26 21 Correspondence to Dr. Dylan Collins at [dylan.collins@alumni.ubc.ca](mailto:dylan.collins@alumni.ubc.ca)  
27  
28  
29  
30  
31  
32  
33  
34  
35  
36  
37  
38  
39  
40  
41  
42  
43  
44  
45  
46  
47  
48  
49  
50  
51  
52  
53  
54  
55  
56  
57  
58  
59  
60

## ABSTRACT

### Introduction

Nearly 90% of all deaths in Republic of Moldova are caused by NCDs, the majority of which (55%) are caused by CVD. In addition to reducing premature mortality from CVD, it is estimated that strengthening primary health care could cut the number hypertension-related hospital admissions and diabetes-related hospitalizations in half. The aim of this evaluation is to determine the feasibility of implementing and evaluating essential interventions for the prevention of CVD in primary health care in Republic of Moldova, with a view toward national scale-up.

### Methods and Analysis

A national steering group including international experts will be convened to adapt WHO PEN protocols one and two to the health system of Republic of Moldova, develop and conduct training of primary health care workers, and test a core set of indicators to monitor the quality of care and change in clinical practice. To evaluate the impact of this pilot implementation, a pragmatic, sequential mixed methods explanatory design, composed of quantitative and qualitative strands of equal weight, will be used. Twenty primary health care centres will be selected and randomized to the training and implementation arm (n=10) and the usual care arm (n=10). At baseline and 12 months follow-up, a standardized data collection form will be piloted to extract data directly from patient paper records in order to estimate the change in clinical practice. Semi-structured interviews and inter-clinic peer workshops will be conducted at 12 months follow-up, and qualitative data collected from these formats will be analysed thematically for explanatory themes that relate to the quantitative findings.

### Ethics and Dissemination

Ethical review and approval has been obtained. Findings of the evaluation will be shared in a project report to key stakeholders, presented back to participants, and written into a manuscript for an open access peer-reviewed scientific journal.

## STRENGTHS AND LIMITATIONS OF THIS STUDY

- To our knowledge, this is the first description of adapting and piloting WHO essential NCD interventions in primary health care in a low- or middle-income country and provides a methodological example to other jurisdictions
- A mixed methods design allows for a greater understanding of the potential barriers and facilitators to implementation and can inform future health systems development
- Primary health care facilities will be selected from different regions of Republic of Moldova in order to pilot implementation in a variety of contexts throughout the country
- Since this is an evaluation of a pilot implementation, the sample size is based on pragmatism and not statistical power
- We are unable to include patient perspectives and experience in the evaluation, which is an important aspect of health care quality

## 68 INTRODUCTION

69  
70 Globally, non-communicable diseases (NCDs) account for more than one-half of the global  
71 burden of disease.(1) In 2016, an estimated 41 million deaths were due to NCDs, of which nearly  
72 half were due to cardiovascular diseases (CVD).(2) Primary health care systems play an  
73 important role in the prevention, early detection, and appropriate management of these diseases,  
74 but many nations lack primary health care capacity.(3,4)

75  
76 To support national governments to realize their commitments in reducing the burden of NCDs,  
77 as agreed in the United Nations Political Declaration on NCDs, the World Health Assembly  
78 endorsed the WHO Global Action Plan for the Prevention and Control of NCDs 2013-2020. To  
79 support implementation of this Action Plan, WHO has identified a set of cost-effective policy  
80 options (“best buys”) for the prevention and control of NCDs within countries.(5)

81  
82 The Republic of Moldova (henceforth “MDA”) is located in Eastern Europe, between Ukraine  
83 and Romania; the Capital and largest city is Chisinau. By gross domestic product per capita,  
84 MDA is one of the poorest countries in the WHO European Region and it is estimated that  
85 21.9% of citizens live below the absolute poverty line of 1 US Dollar per day.(6)

### 86 87 **Non-communicable diseases are a leading cause of death in MDA**

88 While NCDs are a global epidemic, MDA ranks amongst the countries most affected. Nearly  
89 90% of all deaths in MDA are caused by NCDs, the majority of which (55%) are caused by  
90 CVD.(7) In 2016, the probability of dying prematurely from any of the four major NCDs (CVDs,  
91 cancer, diabetes, chronic respiratory disease) was 24.9%,; almost twice as high for men (33.7%)  
92 as women (17.3%).(8) Men and people residing in rural areas are disproportionately impacted by  
93 CVD and represent key populations for public health intervention.(7)

94  
95 This burden is driven by some of the highest rates of NCD risk factors, including tobacco and  
96 alcohol use, in the WHO European region indicated by a 2013 STEPS survey.(9) One-in-four  
97 (25.3%) Moldovans smoke tobacco and this rate nearly doubles in men.(9) Among adults aged  
98 18 to 69, 61.9% currently consume alcohol and one in five people have engaged in heavy  
99 episodic drinking (six or more drinks on any one occasion in the past 30 days).(9)

100  
101 The overall prevalence of obesity amongst adults is 22.9%, being higher among women (28.5%)  
102 as compared with men (17.8%).(7) The prevalence of raised blood pressure (defined as SBP  $\geq$   
103 140 mmHg and/or DBP  $\geq$  90 mmHg or currently taking medication for raised blood pressure)  
104 among MDA’s adult population is 39.8%, and 76.2% of these patients are not on blood pressure  
105 lowering medication.(7) A total of 12.3% of the population have a blood glucose level of  $\geq$  6.1  
106 mmol/L, and 29.4% of the population has a total blood cholesterol level of  $\geq$  5 mmol/L.(7) It is  
107 estimated that one in five (23.0%) people aged 40–69 years have a 10-year fatal or non-fatal  
108 CVD risk of over 30% (including those with an existing CVD).(7)

### 109 110 **Primary health care in MDA and commitment to NCDs**

111 According to the Constitution of Republic of Moldova of 1994, citizens are entitled to a free of  
112 charge minimum package of essential health services, including primary health care. However,  
113 resource constraints have made it difficult to offer these services and significant gaps in care

1  
2  
3 114 exist.(10) According to the most recent data (2010), there were 5.3 family doctors per 10,000  
4 115 inhabitants and 25.9 specialist doctors per 10,000 inhabitants. In rural areas these rates are  
5 116 halved, leading to human resource shortages in primary care.(10) Approximately 17% of  
6 117 practicing physicians in MDA work in primary health care, and 92% of them rely on paper  
7 118 clinical records.(6) The most recent estimate (2009) states that there are approximately 630  
8 119 primary health care centres throughout the country, or 21.2 centres per 100,000 people.(6)

9 120  
10 121 Despite these health system challenges, the Government of Republic of Moldova is committed to  
11 122 improving primary health care capacity for NCDs. It is estimated that 60% of hypertension-  
12 123 related hospital admissions (about 12,000 annually) and 40% of diabetes-related hospitalizations  
13 124 (about 5,000 annually) could be prevented through strengthened primary health care for these  
14 125 conditions.(11)

15 126 As such, strengthening primary health care is one of the commitments set out in the Action  
16 127 Program of the Government of Republic of Moldova 2016–2018.(12) To do this requires the  
17 128 development of simplified clinical protocols, in-person training programs for nurses and doctors,  
18 129 and a core set of indicators to monitor and evaluate changes in the quality of care.  
19 130

### 20 131 **Essential interventions to prevent cardiovascular diseases in primary health care**

21 132 In order to build capacity in primary health care and ultimately prevent premature mortality from  
22 133 CVD in MDA, a study was envisioned to adapt and pilot the World Health Organization Package  
23 134 of Essential NCD Intervention from Primary Healthcare in Low Resource Settings (WHO  
24 135 PEN).(3) WHO PEN includes simplified clinical protocols which together cover the integrated  
25 136 management of hypertension and diabetes, as well as education and counselling on healthy  
26 137 behaviours aimed to prevent CVD. The central strategy of this integrated approach is the use of  
27 138 total cardiovascular risk assessment to stratify and target individuals at high CVD risk, a process  
28 139 considered to be a “best buy” intervention by the WHO.(5)  
29 140

30 141 Since these approaches were unprecedented in MDA, the Ministry of Health, Labour and Social  
31 142 Protection convened a national steering group to lead the adaptation and pilot process, with the  
32 143 goal of using the findings for future health systems development. Led by the primary health care  
33 144 division of the Ministry of Health, the steering group is comprised of representatives from the  
34 145 Nicolae Testemitanu State University of Medicine and Pharmacy and the National Public Health  
35 146 Agency. The national steering group is supported by an international team of experts coordinated  
36 147 jointly by the WHO Regional Office for Europe and WHO Country Office in the Republic of  
37 148 Moldova.  
38 149

## 39 150 **AIM AND OBJECTIVES**

### 40 151 **Aim**

41 152 The aim of the evaluation is to determine the feasibility of implementing and evaluating essential  
42 153 interventions for the prevention of cardiovascular disease in primary health care in MDA, with a  
43 154 view toward national scale-up.  
44 155

### 45 156 **Objectives**

46 157 In order to achieve this aim, the four overarching objectives of the evaluation are to:  
47 158

- 1 159 1. Determine the baseline performance of primary health care services with respect to
- 2 160 essential interventions for the prevention and management of CVD
- 3 161 2. Assess the ability to implement MDA-adapted WHO PEN protocols one and two in pilot
- 4 162 primary health care centres
- 5 163 3. Estimate the change in performance of pilot primary health care centres after 12 months
- 6 164 of protocol implementation and compare this to control clinics using usual care
- 7 165 4. Determine the feasibility of collecting quantitative data required for future studies of
- 8 166 effectiveness from the existing informal paper clinical record system
- 9 167

## 13 168 **METHODS AND ANALYSIS**

### 14 169 **Overview of Process and Design**

15 170 An overview of the methods used to adapt, pilot, and evaluate essential interventions for CVD in  
16 171 primary health care in MDA are summarized by the following seven steps.

#### 17 172 Step One: Adaptation of WHO PEN Protocols to the National Context

18 173 Under the direction of the national steering group, WHO PEN protocols one and two will be  
19 174 compared and contrasted to national disease specific guidelines. The WHO PEN protocols will  
20 175 then be adapted to ensure consistency with the organization, culture, and availability of resources  
21 176 of the health system, while ensuring that they remain simple clinical decision support tools.

#### 22 177 Step Two: Development of a Training Package for Primary Health Care Workers

23 178 A three-day training package will be developed under the direction of the national steering group  
24 179 in order to provide in-person theoretical and practical training to nurses and doctors working in  
25 180 primary health care. This will include lectures, clinical case studies, and practical exercises that  
26 181 embrace the experience and knowledge of participants.

#### 27 182 Step Three: Collection of Baseline Data

28 183 According to the Ministry of Health process, a list of 20 primary health care clinics will be  
29 184 nominated and provided to the working group. They will then be randomized into an intervention  
30 185 group arm (n=10) and control arm (n=10). Data for quantitative indicators will be extracted from  
31 186 all 20 clinics by randomly sampling individual paper-based patient records from all primary  
32 187 health care units using a standardized data collection instrument. This will be done by a specially  
33 188 trained group of postgraduate medical trainees.

#### 34 189 Step Four: Training Staff in Pilot Clinics

35 190 All doctors and nurses from the primary health care centres in the intervention arm will be  
36 191 invited to be trained together by a national team of experts in groups of approximately 30. It is  
37 192 estimated that up to 200 health workers will be trained in total. At the end of training each PHC  
38 193 team will pass through evaluation at the University Centre for Simulation in Medical Training  
39 194 using objective structured clinical exams and get feedback from trainers and peers.

#### 40 195 Step Five: Implementation of Protocols

41 196 Trained participants from the ten primary health care clinics in the intervention arm will then be  
42 197 free to implement the clinical protocols and change their clinical practice, without incentives, for  
43 198 12 months. During this time, a team of national experts will be created to offer support (distance  
44 199

205 and on-the-job) to the primary health care centres in the intervention arm. All ten clinics in the  
206 intervention arm will receive at least one in-person follow-up support visit.

207

#### 208 Step Six: Collection of Follow-up Data

209 After 12 months, using the same method and data collection instruments used to collect baseline  
210 quantitative data (Step Three), data will again be extracted from randomly selected individual  
211 paper-based patient records from all 20 health care centres. Five primary health care centres  
212 from the intervention arm will be selected by the national steering group for one-on-one semi  
213 structured interviews with health staff. This will be supplemented by inviting a selection of staff  
214 from all ten health centres in the intervention arm to participate in focus groups. Together, these  
215 qualitative data will be analysed thematically for explanatory themes.

216

#### 217 Step Seven: Evaluation of Results and Sharing Experience

218 The findings of the quantitative and qualitative analyses will be integrated in a final report and  
219 shared with key stakeholders, including health staff from the participating primary health care  
220 centres. The results will also be shared at a national conference and in an open-access peer  
221 reviewed journal, in order to inform the future development of primary health care capacity in  
222 MDA.

223

#### 224 **Methodological Design**

225 A pragmatic, sequential mixed methods explanatory design, composed of quantitative and  
226 qualitative strands of equal weight, will be used (Figure 1). This design was chosen for because it  
227 allows for the use of qualitative data to enlighten and explain the quantitative findings, including  
228 but not limited to the feasibility of collecting data from paper-based records, the contextual  
229 factors affecting guideline implementation, changes in clinical practice, and optimization for the  
230 future.

231

232 **Figure 1.** Illustration using the GATE frame structure (13) of the mixed methods evaluation  
233 design

234

235 A sample size of 20 primary health care centres was chosen because it was seen as a good  
236 balance of allowing for variation in clinic geography and demography, while still remaining  
237 feasible for the pilot implementation. Half of the centres (n=10) will be randomly allocated to the  
238 intervention arm and half (n=10) to the control arm. Baseline data will be collected from both  
239 intervention and control clinics, ensuring that baseline data is collected before implementation  
240 occurs.

241

242 Within clinic comparisons will be used to compare the 12 months before implementation with  
243 the 12 months of implementation. Between clinics comparison will be used to compare the  
244 intervention clinics with control clinics during the same time period.

245

#### 246 **Eligibility Criteria for Primary Health Care Centres**

247 Health facilities will be nominated by the Ministry of Health for participation based on the  
248 following eligibility criteria: (1) primary health care facilities must be operating in the public  
249 sector as legal entities; (2) primary health care facilities must be sampled in a way such that they  
250 are geographically distributed evenly across the country; equally from the Central, North and

251

252

253

254

255

256

257



1  
2  
3 251 Southern regions of MDA; and (3) health facilities must be primary health care centres that are  
4 252 managed by family doctors with no specialist doctors working in the facility.  
5 253

### 6 254 **Randomization**

7  
8 255 The clinics will be stratified based on the ratio of patients to family doctors to minimize possible  
9 256 confounding by doctor caseload, and then randomized electronically into two groups of 10  
10 257 primary health care centres.  
11 258

### 12 259 **Comparison**

13 260 The 10 primary health care centres in the intervention arm will be compared to the 10 primary  
14 261 health care centres in the control arm. The control arm will receive no intervention and proceed  
15 262 with usual care.  
16 263

### 17 264 **Quantitative Indicators**

18  
19 265 Indicators were developed to balance input and process indicators, such as measurement of risk  
20 266 factors and calculation of risk scores, with output (e.g. prescribing) and outcome (e.g. blood  
21 267 pressure control) indicators. While one of the objectives of this evaluation is to determine the  
22 268 ability to measure these indicators based on routine paper records, we used our existing  
23 269 knowledge of the health system to design indicators which were valuable and likely to be  
24 270 feasible to calculate. Table 1 shows the indicator, the question the indicator seeks to answer, and  
25 271 the respective numerator and denominator definitions which will be used in the calculations.  
26 272

27  
28 273 **Table 1.** Indicators, their numerators and denominators, and questions the indicators answer  
29 274

### 30 275 **Data Collection and Management**

#### 31 276 Quantitative Data Collection Tool

32 277  
33 278 A standardized data collection template has been developed for extracting anonymized patient  
34 279 data from individual paper records (Table 2). An online version was also made to allow for data  
35 280 entry on a computer or smartphone. It is estimated to take 15 minutes to extract data from one  
36 281 patient record since the records are made of blank paper with no formal structure or organization  
37 282 of health data.  
38 283

39 284 **Table 2.** Standardized data collection form used to extract data from individual patient records  
40 285

#### 41 286 Method of Randomly Sampling Patient Records

42 287 A random sample of the records of patients aged over 40, who have visited the medical facility  
43 288 within the past 12 months, will be taken. Since medical records in MDA are organized  
44 289 alphabetically on shelves, we created a randomly generated list of alphanumeric combinations  
45 290 that allowed for the selection of patient charts at random. For example, an alphanumeric code of  
46 291 "C24" would correspond to the 24<sup>th</sup> patient chart in the section of last names starting with the  
47 292 letter C.  
48 293

49 294 The list will be followed in the order that it was generated so as to prevent selection bias. The  
50 295 randomly selected chart will then be checked to see if it meets two inclusion criteria: (1) the  
51 296 patient is aged 18 years or older and (2) the patient visited the health centre within the last 12  
52  
53  
54  
55  
56  
57  
58  
59  
60

1  
2  
3 297 months. If the record meets these criteria, data will then be extracted. If it does not, it will be  
4 298 returned to the shelf and the next alphanumeric code on the randomly generated list will be used.  
5 299 This process will be repeated in each clinic until a sample size of 1.2% of the patient population  
6 300 in each clinic is sampled. This proportion was chosen pragmatically such that the average sample  
7 301 per primary health care centre would equal 100 unique patients.  
8 302

### 303 Data Analysis

11 304 The change in indicators from baseline to follow-up will be calculated for intervention clinics  
12 305 and compared with control clinics. Subgroup analysis by age, gender, and other demographic  
13 306 features may be done as deemed appropriate by the national steering committee. All analyses  
14 307 will account for stratified sampling.  
15 308

### 17 309 Qualitative Data Collection

#### 18 310 **Follow-up Support Visits**

19 311 Follow-up visits will be made to each intervention clinic at least once during the implementation  
20 312 timeframe (12 months) to provide ad hoc implementation support. These visits will be  
21 313 conducted by members of the national steering group, who will keep field notes about each visit  
22 314 and provide feedback and support to the health centres. The perspectives gained through follow-  
23 315 up support visits will be used by the national steering group to develop preliminary data  
24 316 collection tools for semi-structured interviews.  
25 316  
26

#### 27 317 **Semi-Structured Interviews**

28 318 A maximum variation sample of half of the intervention clinics (n=5) will be chosen, based on  
29 319 the perceived performance of each clinic by the evaluation steering committee. A pragmatic  
30 320 sample of clinic managers (n=1 per clinic), doctors (n=3 per clinic), and nurses (n=3 per clinic)  
31 321 will be interviewed one-on-one, using a semi-structured format. Interviews will proceed until  
32 322 data saturation has been reached, to a maximum of 30 interviews. After obtaining written,  
33 323 informed consent, interviews will be of 30 to 60 minutes in length, audio recorded, and be  
34 324 transcribed verbatim and analysed thematically using framework thematic analysis.(14)  
35 324  
36

#### 37 325 **Focus Group Workshop**

38 326 Participants from all ten implementation clinics will be invited to a workshop to further collect  
39 327 explanatory qualitative data and to critically reflect on the implementation process. Participants  
40 328 will be a mix of doctors, nurses, and managers from the intervention clinics.  
41 328  
42 329

43 330 Participants will be placed into small groups based on their profession, and asked to complete a  
44 331 standardized worksheet. Each group will be under the guidance of a facilitator, and emergent  
45 332 themes from one-one-one interviews will be used as prompts to each group. The worksheet will  
46 333 allow for each group to directly comment, modify, or add to the emergent themes, create new  
47 334 themes, and organize themes into categories such as barriers and facilitators.  
48 335

49 336 The resulting qualitative data will be analysed thematically using the framework approach, and  
50 337 used to help explain the findings of the quantitative strand.(14)  
51 337  
52 338  
53  
54  
55  
56  
57  
58  
59  
60

### 339 **Patient and Public Involvement**

340 Neither patients nor the public were involved in the methodological design.

341

342

### 343 **ETHICS AND DISSEMINATION**

#### 344 **Ethical Review and Approval**

345 This project was reviewed by the Research Ethics Committee of the Nicolae Testemitanu State  
346 University of Medicine and Pharmacy of the Republic of Moldova and granted permission on 31  
347 May 2017.

348

#### 349 **Dissemination**

350 Quantitative findings will be summarized and presented back to all intervention clinics during  
351 follow-up workshops. A comprehensive project report will be written and shared with key  
352 stakeholders. A final report of key findings of the evaluation will be written and submitted to an  
353 open access peer-reviewed journal and made available to all study participants so they can use  
354 the findings to improve their practice. The findings will be used to evaluate the feasibility of a  
355 national scale-up of essential NCD interventions in primary health care in MDA.

356

### 357 **REFERENCES**

- 358 1. Benziger CP, Roth GA, Moran AE. The Global Burden of Disease Study and the  
359 Preventable Burden of NCD. *Glob Heart*. England; 2016 Dec;11(4):393–7.
- 360 2. World Health Organization (WHO). World Health Statistics [Internet]. 2018. Available  
361 from: [http://www.who.int/gho/publications/world\\_health\\_statistics/2018/en/](http://www.who.int/gho/publications/world_health_statistics/2018/en/)
- 362 3. World Health Organization (WHO). Package of Essential Noncommunicable (PEN)  
363 disease interventions for primary health care in low-resource settings [Internet]. 2013.  
364 Available from: [http://www.who.int/ncds/management/pen\\_tools/en/](http://www.who.int/ncds/management/pen_tools/en/)
- 365 4. World Health Organization (WHO). Global action plan for the prevention and control of  
366 NCDs 2013-2020. 2013.
- 367 5. Organization WH. Tackling NCDs: “Best buys” and other recommended interventions for  
368 the prevention and control of noncommunicable diseases [Internet]. 2017. Available from:  
369 [http://apps.who.int/iris/bitstream/handle/10665/259232/WHO-NMH-NVI-17.9-  
370 eng.pdf;jsessionid=074ED8768EA1FFD0E632DB861E91A6FD?sequence=1](http://apps.who.int/iris/bitstream/handle/10665/259232/WHO-NMH-NVI-17.9-eng.pdf;jsessionid=074ED8768EA1FFD0E632DB861E91A6FD?sequence=1)
- 371 6. World Health Organization (WHO). Evaluation of the structure and provision of primary  
372 care in the Republic of Moldova. 2012.
- 373 7. National Center for Health Management. Health Yearbook: Public Health in Moldova  
374 [Internet]. 2015. Available from: <http://www.cnms.md/ro/rapoarteo>
- 375 8. World Health Organization. Global Health Observatory data repository [Internet]. [cited  
376 2018 Jul 10]. Available from: <http://apps.who.int/gho/data/node.home>
- 377 9. World Health Organization (WHO). Prevalence of Noncommunicable Disease Risk  
378 Factors in the Republic of Moldova (STEPS) [Internet]. 2014. Available from:  
379 [http://www.who.int/ncds/surveillance/steps/Moldova\\_2013\\_STEPS\\_Report.pdf](http://www.who.int/ncds/surveillance/steps/Moldova_2013_STEPS_Report.pdf)
- 380 10. Turcanu C, Domente S, Buga M, Richardson E. Health Systems in Transition: Republic of  
381 Moldova [Internet]. 2012. Available from:  
382 [http://www.euro.who.int/\\_\\_data/assets/pdf\\_file/0006/178053/HiT-Moldova.pdf](http://www.euro.who.int/__data/assets/pdf_file/0006/178053/HiT-Moldova.pdf)
- 383 11. World Health Organization (WHO). Ambulatory care sensitive conditions in the Republic  
384 of Moldova [Internet]. 2015. Available from:

- 1  
2  
3 385 <http://www.euro.who.int/en/countries/republic-of-moldova/publications/ambulatory-care-sensitive-conditions-in-the-republic-of-moldova-2015>  
4 386  
5 387 12. Government of the Republic of Moldova. Action Program of the Government of the  
6 388 Republic of Moldova 2016–2018 [Internet]. 2016. Available from:  
7 389 [http://gov.md/sites/default/files/document/attachments/guvernul\\_republicii\\_moldova\\_-](http://gov.md/sites/default/files/document/attachments/guvernul_republicii_moldova_-_programul_de_activitate_al_guvernului_republicii_moldova_2016-2018.pdf)  
8 390 [\\_programul\\_de\\_activitate\\_al\\_guvernului\\_republicii\\_moldova\\_2016-2018.pdf](http://gov.md/sites/default/files/document/attachments/guvernul_republicii_moldova_-_programul_de_activitate_al_guvernului_republicii_moldova_2016-2018.pdf)  
9 391 13. Jackson R, Ameratunga S, Broad J, Connor J, Lethaby A, Robb G, et al. The GATE  
10 392 frame: critical appraisal with pictures. Vol. 144, ACP journal club. United States; 2006. p.  
11 393 A8-11.  
12 394 14. Gale NK, Heath G, Cameron E, Rashid S, Redwood S. Using the framework method for  
13 395 the analysis of qualitative data in multi-disciplinary health research. BMC Med Res  
14 396 Methodol. England; 2013 Sep;13:117.  
15 397

#### 18 398 **AUTHORS AND CONTRIBUTIONS**

19 399 DC, AC, TL, GC, VS, TZ, AA, and JF contributed to the methodological design. DC, AC, TL,  
20 400 and JF contributed to writing the manuscript.  
21 401

#### 22 402 **FUNDING STATEMENT**

23 403 This study is funded jointly by the Swiss Agency for Development and Cooperation (SDC) and WHO  
24 404 Regional Office for Europe.  
25 405

#### 26 406 **COMPETING INTERESTS STATEMENT**

27 407 DC, AC, TL, GC, VS, TZ, AA, JF declare no competing interests.  
28 408  
29  
30  
31  
32  
33  
34  
35  
36  
37  
38  
39  
40  
41  
42  
43  
44  
45  
46  
47  
48  
49  
50  
51  
52  
53  
54  
55  
56  
57  
58  
59  
60

409 **Table 1.** Indicators, their numerators and denominators, and questions the indicators answer

| Question                                                                                                                         | Indicator                                                                                                                                                                                                                                            | Numerator                                                                                                                                                                                                                                                                                                                                                                                                                                                                       | Denominator                                                                                                                                                                                                                                                                                                                                                                                                                                               |
|----------------------------------------------------------------------------------------------------------------------------------|------------------------------------------------------------------------------------------------------------------------------------------------------------------------------------------------------------------------------------------------------|---------------------------------------------------------------------------------------------------------------------------------------------------------------------------------------------------------------------------------------------------------------------------------------------------------------------------------------------------------------------------------------------------------------------------------------------------------------------------------|-----------------------------------------------------------------------------------------------------------------------------------------------------------------------------------------------------------------------------------------------------------------------------------------------------------------------------------------------------------------------------------------------------------------------------------------------------------|
| Are risk factors being measured?                                                                                                 | Proportion of eligible patients who have all risk factor values recorded as required for calculation of risk score                                                                                                                                   | Patients aged 40 or older who have visited in the last 12 months who have all measurements required for calculation of risk score within 12 months of the most recent date of visit                                                                                                                                                                                                                                                                                             | Patients aged 40 or older who have visited in the last 12 months                                                                                                                                                                                                                                                                                                                                                                                          |
| Are risk factor measurements being converted to a total risk score?                                                              | Proportion of patients aged 40 or older who have visited in the last 12 months who have all measurements required for calculation of risk score within 12 months of the most recent date of visit, that have a documented risk score                 | Patients aged 40 or older who have visited in the last 12 months who have all measurements required for calculation of risk score within 12 months of the most recent date of visit, that have a documented risk score                                                                                                                                                                                                                                                          | Patients aged 40 or older who have visited in the last 12 months who have all measurements required for calculation of risk score within 12 months of the most recent date of visit                                                                                                                                                                                                                                                                       |
| Are risk scores calculated correctly?                                                                                            | Proportion of patients aged 40 or older who have visited in the last 12 months who have all measurements required for calculation of risk score within 12 months of the most recent date of visit, that have a documented risk score that is correct | Patients aged 40 or older who have visited in the last 12 months who have all measurements required for calculation of risk score within 12 months of the most recent date of visit, that have a documented risk score that is correct                                                                                                                                                                                                                                          | Patients aged 40 or older who have visited in the last 12 months who have all measurements required for calculation of risk score within 12 months of the most recent date of visit, that have a documented risk score                                                                                                                                                                                                                                    |
| Are patients being risk scored?                                                                                                  | Proportion of eligible patients with a documented risk score                                                                                                                                                                                         | Patients aged 40 or older who have visited in the last 12 months with a documented risk score                                                                                                                                                                                                                                                                                                                                                                                   | Patients aged 40 or older who have visited in the last 12 months                                                                                                                                                                                                                                                                                                                                                                                          |
| Are risk scores calculated correctly?                                                                                            | Proportion of eligible patients with a documented risk score that is correct                                                                                                                                                                         | Patients aged 40 or older who have visited in the last 12 months with a documented risk score that is correct                                                                                                                                                                                                                                                                                                                                                                   | Patients aged 40 or older who have visited in the last 12 months with a documented risk score                                                                                                                                                                                                                                                                                                                                                             |
| Are statins prescribed to the correct patients?                                                                                  | Proportion of eligible patients prescribed a statin                                                                                                                                                                                                  | Patients with existing CVD, diabetics 40 or older with high LDL values (as defined based on total CVD risk of SCORE 10-14% in LDL $\geq 2.6$ mmol/L; with very high risk SCORE $\geq 15\%$ in LDL $\geq 1.8$ mmol/L), or patients with a SCORE of $\leq 9\%$ and LDL $\geq 2.6$ or total cholesterol $\geq 7.2$ , or patients with a SCORE of 10-14% and a LDL $\geq 1.8$ or total cholesterol $\geq 7.2$ mmol/L, or patients with a SCORE of $\geq 15\%$ , prescribed a statin | Patients with existing CVD, diabetics 40 or older with high LDL values (as defined based on total CVD risk of SCORE 10-14% in LDL $\geq 2.6$ mmol/L; with very high risk SCORE $\geq 15\%$ in LDL $\geq 1.8$ mmol/L), or patients with a SCORE of $\leq 9\%$ and LDL $\geq 2.6$ or total cholesterol $\geq 7.2$ , or patients with a SCORE of 10-14% and a LDL $\geq 1.8$ or total cholesterol $\geq 7.2$ mmol/L, or patients with a SCORE of $\geq 15\%$ |
| Are statins prescribed correctly based on documented risk score?                                                                 | Proportion of patients eligible based on documented risk score prescribed a statin                                                                                                                                                                   | Patients with a documented risk score as very high risk SCORE $\geq 15\%$ prescribed a statin                                                                                                                                                                                                                                                                                                                                                                                   | Patients with a documented risk score as very high risk SCORE $\geq 15\%$                                                                                                                                                                                                                                                                                                                                                                                 |
| Are patients with existing disease, who do not require the calculation of a risk score to prescribe statins, prescribed statins? | Proportion of patients with existing CVD prescribed a statin                                                                                                                                                                                         | Patients with existing CVD prescribed a statin                                                                                                                                                                                                                                                                                                                                                                                                                                  | Patients with existing CVD                                                                                                                                                                                                                                                                                                                                                                                                                                |
| Is the blood pressure of high risk patients controlled?                                                                          | Proportion of high risk patients (SCORE $\geq 15\%$ or DM and age over 40)                                                                                                                                                                           | Patients with a true risk score indicating a very high risk (SCORE $\geq 15\%$ ) or DM and age                                                                                                                                                                                                                                                                                                                                                                                  | Patients with a true risk score indicating a very high risk (SCORE $\geq 15\%$ ) or DM and                                                                                                                                                                                                                                                                                                                                                                |

|                                                                             |                                                                                                                     |                                                                                                                           |                                                 |
|-----------------------------------------------------------------------------|---------------------------------------------------------------------------------------------------------------------|---------------------------------------------------------------------------------------------------------------------------|-------------------------------------------------|
|                                                                             | whose last two recorded blood pressure measurements were <130/80 mmHg                                               | over 40 whose last two documented blood pressure readings were <130/80                                                    | age over 40                                     |
| Is the blood pressure of lower risk patients controlled?                    | Proportion of lower risk patients (SCORE<15%) whose last two recorded blood pressure measurements were <140/90 mmHg | Patients with a true risk score indicating <15% whose last two documented blood pressure readings were <140/90            | Patients with a true risk score indicating <15% |
| Are patients with existing CVD prescribed basic medications to reduce risk? | Proportion of patients with existing CVD prescribed a statin and aspirin and blood pressure lowering treatment      | Patients with existing CVD prescribed a statin and aspirin and blood pressure lowering treatment                          | Patients with existing CVD                      |
| Is the blood glucose of diabetic patients controlled?                       | Proportion of diabetic patients with glycaemic control as defined by last two HbA1c measurements                    | Patients with diabetes 2 whose last two HbA1c measurements were below personal target as defined by MDA adapted WHO PEN 1 | Patients with diabetes type 2                   |
| Is the blood pressure of hypertensive patients controlled?                  | Proportion of confirmed hypertensive patients whose SBP is <140/90 at last two visits                               | Patients with confirmed hypertension whose last two blood pressure readings were <140/90                                  | Patients with confirmed hypertension            |
| What is the prevalence of high blood pressure?                              | Proportion of people whose last two systolic blood pressure reading are 140 mmHg or above                           | Patients whose last two systolic blood pressure readings were $\geq$ 140                                                  | All patients over 18                            |

410  
411  
412

413 **Table 2.** Standardized data collection form used to extract data from individual patient records  
 414

| <b>Data Collection Question</b>                                                                               | <b>Answer</b> |
|---------------------------------------------------------------------------------------------------------------|---------------|
| What is your name? (Name of person extracting data)                                                           |               |
| Date of Data Extraction (MM-DD-YYYY)                                                                          |               |
| Write the Clinic Name                                                                                         |               |
| Is this a duplicate extraction?                                                                               |               |
| If it is a duplicate extraction, enter the number you and your extraction partner have assigned to this file. |               |
| Date of Birth (MM-DD-YYYY)                                                                                    |               |
| Sex (M/F)                                                                                                     |               |
| Smoking Status (Y/M)                                                                                          |               |
| Diagnosis of Hypertension (Y/N)                                                                               |               |
| Date of Hypertension Diagnosis (MM-DD-YYYY)                                                                   |               |
| Can you find one or more blood pressure readings? (Y/N)                                                       |               |
| Most Recent Systolic Blood Pressure                                                                           |               |
| Most Recent Diastolic Blood Pressure                                                                          |               |
| Date of the Most Recent Blood Pressure Measurement (MM-DD-YYYY)                                               |               |
| Can you find a second most recent blood pressure reading? (Y/N)                                               |               |
| Second most recent systolic blood pressure                                                                    |               |
| Second most recent diastolic blood pressure                                                                   |               |
| Date of the second most recent systolic blood pressure (MM-DD-YYYY)                                           |               |
| Diagnosis of Diabetes (Type 1, Type 2, No)                                                                    |               |
| Can you find one or more HbA1c measurements? (Y/N)                                                            |               |
| Most recent HbA1c reading (mmol/mol)                                                                          |               |
| Date of the most recent HbA1c measurement? (MM-DD-YYYY)                                                       |               |
| Can you find another HbA1c measurement? (Y/N)                                                                 |               |
| Second most recent HbA1c reading (mmol/mol, otherwise specify unit)                                           |               |
| Date of the second most recent HbA1c reading? (MM-DD-YYYY)                                                    |               |
| Can you find one or more total cholesterol measurements? (Y/N)                                                |               |
| Most recent total cholesterol reading (mmol/L)                                                                |               |
| Date of the most recent cholesterol reading (MM-DD-YYYY)                                                      |               |
| Can you find another cholesterol measurement? (Y/N)                                                           |               |
| Second most recent cholesterol reading (mmol/L)                                                               |               |
| Date of the second most recent cholesterol reading (MM-DD-YYYY)                                               |               |
| Was the patient prescribed a statin? (Y/N)                                                                    |               |
| What was the date of the statin prescription? (MM-DD-YYYY)                                                    |               |

|    |                                                                                                                                                                                                                                          |  |
|----|------------------------------------------------------------------------------------------------------------------------------------------------------------------------------------------------------------------------------------------|--|
| 1  | What was the drug and dose?                                                                                                                                                                                                              |  |
| 2  | Does the patient have existing CVD? (Y/N)                                                                                                                                                                                                |  |
| 3  | State the type of CVD                                                                                                                                                                                                                    |  |
| 4  | Has the patient been prescribed acetylsalicylic acid (ASA or aspirin)? (Y/N)                                                                                                                                                             |  |
| 5  | What was the most recent date that ASA was prescribed? (MM-DD-YYYY)                                                                                                                                                                      |  |
| 6  | Has the patient been prescribed anti-hypertensives? (Y/N)                                                                                                                                                                                |  |
| 7  | What was the most recent date that anti-hypertensives were prescribed? (MM-DD-YYYY)                                                                                                                                                      |  |
| 8  | Can you find a documented ESC SCORE risk score? (Y/N)                                                                                                                                                                                    |  |
| 9  | Enter the most recent documented ESC SCORE risk score (%)                                                                                                                                                                                |  |
| 10 | What was the date the risk score was documented? (MM-DD-YYYY)                                                                                                                                                                            |  |
| 11 | Please record any important notes about the data extraction here. Examples include an error you think may have been made, clarification of the units for measurements (e.g. mmol/L vs mg/dL). Or notes that you would like for yourself. |  |

415



1  
2  
3  
4  
5  
6  
7  
8  
9  
10  
11  
12  
13  
14  
15  
16  
17  
18  
19  
20  
21  
22  
23  
24  
25  
26  
27  
28  
29  
30  
31  
32  
33  
34  
35  
36  
37  
38  
39  
40  
41  
42

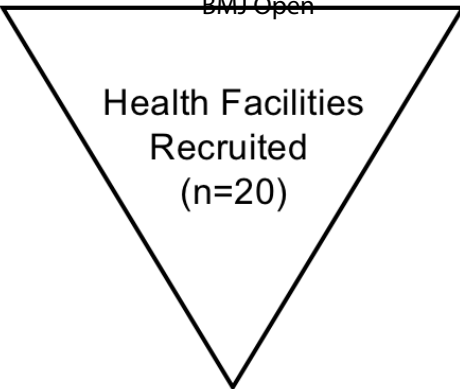

**Randomization**

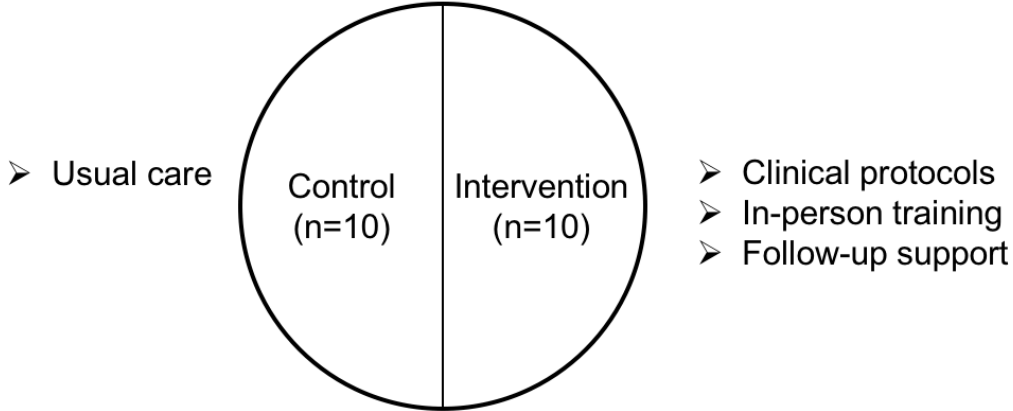

**Data Collection**

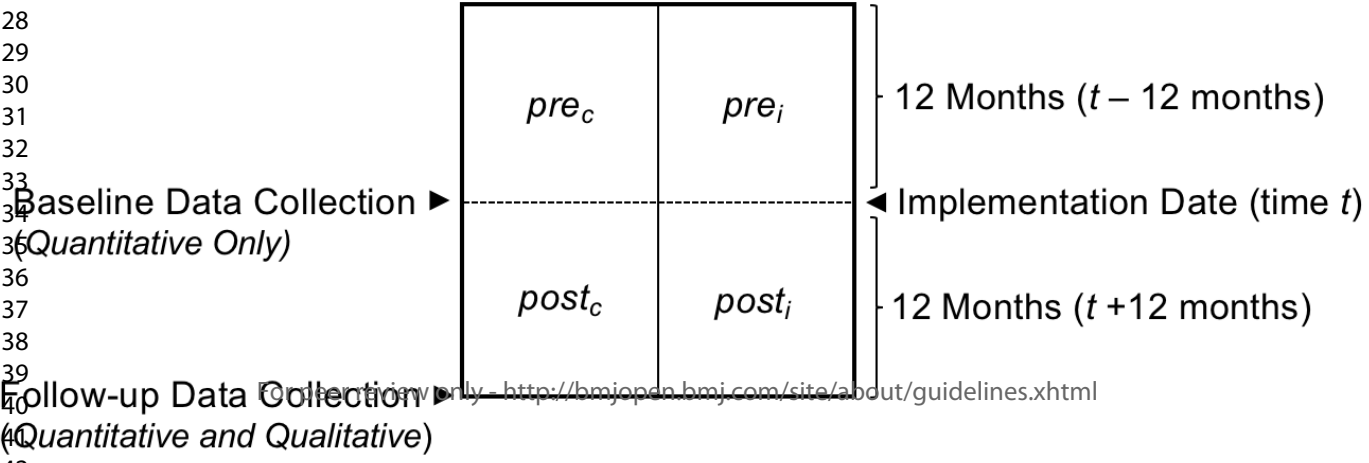

# BMJ Open

## Protocol for the Evaluation of a Pilot Implementation of Essential Interventions for the Prevention of Cardiovascular Diseases in Primary Health Care in the Republic of Moldova

|                                 |                                                                                                                                                                                                                                                                         |
|---------------------------------|-------------------------------------------------------------------------------------------------------------------------------------------------------------------------------------------------------------------------------------------------------------------------|
| Journal:                        | <i>BMJ Open</i>                                                                                                                                                                                                                                                         |
| Manuscript ID                   | bmjopen-2018-025705.R1                                                                                                                                                                                                                                                  |
| Article Type:                   | Protocol                                                                                                                                                                                                                                                                |
| Date Submitted by the Author:   | 23-Mar-2019                                                                                                                                                                                                                                                             |
| Complete List of Authors:       | Collins, Dylan; University of British Columbia, Ciobanu, Angela<br>Laatikainen, Tiina; National Institute for Health and Welfare, Epidemiology and Health Promotion<br>Curocichin, Ghenadie<br>Salaru, Virginia<br>Zatic, Tatiana<br>Anisei, Angela<br>Farrington, Jill |
| <b>Primary Subject Heading</b>: | Cardiovascular medicine                                                                                                                                                                                                                                                 |
| Secondary Subject Heading:      | Public health                                                                                                                                                                                                                                                           |
| Keywords:                       | Cardiology < INTERNAL MEDICINE, PRIMARY CARE, Quality in health care < HEALTH SERVICES ADMINISTRATION & MANAGEMENT, Protocols & guidelines < HEALTH SERVICES ADMINISTRATION & MANAGEMENT                                                                                |
|                                 |                                                                                                                                                                                                                                                                         |

SCHOLARONE™  
Manuscripts

1  
2  
3 1 **Protocol for the Evaluation of a Pilot Implementation of Essential Interventions for the**  
4 2 **Prevention of Cardiovascular Diseases in Primary Health Care in the Republic of Moldova**  
5 3  
6 4  
7 5

8 5 Dylan R. J. Collins<sup>1</sup>, Angela Ciobanu<sup>2</sup>, Tiina Laatikainen<sup>3</sup>, Ghenadie Curocichin<sup>4</sup>, Virginia  
9 6 Salaru<sup>4</sup>, Tatiana Zatic<sup>5</sup>, Angela Anisei<sup>6</sup>, Jill L. Farrington<sup>7</sup>  
10 7  
11 8

12 9 <sup>1</sup>University of British Columbia, Vancouver, Canada

13 10 <sup>2</sup>World Health Organization Country Office in Republic of Moldova, Chisinau, Republic of  
14 11 Moldova

15 12 <sup>3</sup>Institute of Public Health and Clinical Nutrition, Helsinki, Finland

16 13 <sup>4</sup>Family Medicine Department, Nicolae Testemitanu State Medical and Pharmaceutical  
17 14 University, Chisinau, Republic of Moldova

18 15 <sup>5</sup>Primary, Emergency and Community Health Policies Department, Ministry of Health, Labour  
19 16 and Social Protection, Chisinau, Republic of Moldova

20 17 <sup>6</sup>Department on Quality Management of Health Services, National Public Health Agency,  
21 18 Republic of Moldova

22 19 <sup>7</sup>World Health Organization Regional Office for Europe, Copenhagen, Denmark  
23 20  
24 21

25 22  
26 21 Correspondence to Dr. Dylan Collins at [dylan.collins@alumni.ubc.ca](mailto:dylan.collins@alumni.ubc.ca)  
27 22  
28  
29  
30  
31  
32  
33  
34  
35  
36  
37  
38  
39  
40  
41  
42  
43  
44  
45  
46  
47  
48  
49  
50  
51  
52  
53  
54  
55  
56  
57  
58  
59  
60

## 23 ABSTRACT

### 25 Introduction

26 Nearly 90% of all deaths in Republic of Moldova are caused by NCDs, the majority of which  
27 (55%) are caused by CVD. In addition to reducing premature mortality from CVD, it is estimated  
28 that strengthening primary health care could cut the number hypertension-related hospital  
29 admissions and diabetes-related hospitalizations in half. The aim of this evaluation is to determine  
30 the feasibility of implementing and evaluating essential interventions for the prevention of CVD  
31 in primary health care in Republic of Moldova, with a view toward national scale-up.

### 33 Methods and Analysis

34 A national steering group including international experts will be convened to adapt WHO PEN  
35 protocols one and two to the health system of Republic of Moldova, develop and conduct training  
36 of primary health care workers, and test a core set of indicators to monitor the quality of care and  
37 change in clinical practice. To evaluate the impact of this pilot implementation, a pragmatic,  
38 sequential mixed methods explanatory design, composed of quantitative and qualitative strands of  
39 equal weight, will be used. Twenty primary health care centres will be selected and randomized to  
40 the training and implementation arm (n=10) and the usual care arm (n=10). At baseline and 12  
41 months follow-up, a standardized data collection form will be piloted to extract data directly from  
42 patient paper records in order to estimate the change in clinical practice. Semi-structured  
43 interviews and inter-clinic peer workshops will be conducted at 12 months follow-up, and  
44 qualitative data collected from these formats will be analysed thematically for explanatory themes  
45 that relate to the quantitative findings.

### 47 Ethics and Dissemination

48 Ethical review and approval has been obtained. Findings of the evaluation will be shared in a  
49 project report to key stakeholders, presented back to participants, and written into a manuscript for  
50 an open access peer-reviewed scientific journal.

## 53 STRENGTHS AND LIMITATIONS OF THIS STUDY

- 55 • To our knowledge, this is the first description of adapting and piloting WHO essential NCD  
56 interventions in primary health care in a low- or middle-income country and provides a  
57 methodological example to other jurisdictions
- 58 • A mixed methods design allows for a greater understanding of the potential barriers and  
59 facilitators to implementation and can inform future health systems development
- 60 • Primary health care facilities will be selected from different regions of Republic of  
61 Moldova in order to pilot implementation in a variety of contexts throughout the country
- 62 • Since this is an evaluation of a pilot implementation, the sample size is based on  
63 pragmatism and not statistical power
- 64 • We are unable to include patient perspectives and experience in the evaluation, which is an  
65 important aspect of health care quality

## 67 INTRODUCTION

68  
69 Globally, non-communicable diseases (NCDs) account for more than one-half of the global burden  
70 of disease.(1) In 2016, an estimated 41 million deaths were due to NCDs, of which nearly half  
71 were due to cardiovascular diseases (CVD).(2) Primary health care systems play an important role  
72 in the prevention, early detection, and appropriate management of these diseases, but many nations  
73 lack primary health care capacity.(3,4)

74  
75 To support national governments to realize their commitments in reducing the burden of NCDs,  
76 as agreed in the United Nations Political Declaration on NCDs, the World Health Assembly  
77 endorsed the WHO Global Action Plan for the Prevention and Control of NCDs 2013-2020. To  
78 support implementation of this Action Plan, WHO has identified a set of cost-effective policy  
79 options (“best buys”) for the prevention and control of NCDs within countries.(5)

80  
81 The Republic of Moldova (henceforth “MDA”) is located in Eastern Europe, between Ukraine and  
82 Romania; the Capital and largest city is Chisinau. By gross domestic product per capita, MDA is  
83 one of the poorest countries in the WHO European Region and it is estimated that 21.9% of citizens  
84 live below the absolute poverty line of 1 US Dollar per day.(6)

### 86 **Non-communicable diseases are a leading cause of death in MDA**

87 While NCDs are a global epidemic, MDA ranks amongst the countries most affected. Nearly 90%  
88 of all deaths in MDA are caused by NCDs, the majority of which (55%) are caused by CVD.(7)  
89 In 2016, the probability of dying prematurely from any of the four major NCDs (CVDs, cancer,  
90 diabetes, chronic respiratory disease) was 24.9%,; almost twice as high for men (33.7%) as women  
91 (17.3%).(8) Men and people residing in rural areas are disproportionately impacted by CVD and  
92 represent key populations for public health intervention.(7)

93  
94 This burden is driven by some of the highest rates of NCD risk factors, including tobacco and  
95 alcohol use, in the WHO European region indicated by a 2013 STEPS survey.(9) One-in-four  
96 (25.3%) Moldovans smoke tobacco and this rate nearly doubles in men.(9) Among adults aged 18  
97 to 69, 61.9% currently consume alcohol and one in five people have engaged in heavy episodic  
98 drinking (six or more drinks on any one occasion in the past 30 days).(9)

99  
100 The overall prevalence of obesity amongst adults is 22.9%, being higher among women (28.5%)  
101 as compared with men (17.8%).(9) The prevalence of raised blood pressure (defined as SBP  $\geq$   
102 140 mmHg and/or DBP  $\geq$  90 mmHg or currently taking medication for raised blood pressure)  
103 among MDA’s adult population is 39.8%, and 76.2% of these patients are not on blood pressure  
104 lowering medication.(9) A total of 12.3% of the population have a blood glucose level of  $\geq$  6.1  
105 mmol/L, and 29.4% of the population has a total blood cholesterol level of  $\geq$  5 mmol/L.(9) It is  
106 estimated that one in five (23.0%) people aged 40–69 years have a 10-year fatal or non-fatal CVD  
107 risk of over 30% (including those with an existing CVD).(9)

### 109 **Primary health care in MDA and commitment to NCDs**

110 According to the Constitution of Republic of Moldova of 1994, citizens are entitled to a free of  
111 charge minimum package of essential health services, including primary health care. However,  
112 resource constraints have made it difficult to offer these services and significant gaps in care

1  
2  
3 113 exist.(10) According to the most recent data (2010), there were 5.3 family doctors per 10,000  
4 114 inhabitants and 25.9 specialist doctors per 10,000 inhabitants. In rural areas these rates are halved,  
5 115 leading to human resource shortages in primary care.(10) Approximately 17% of practicing  
6 116 physicians in MDA work in primary health care, and 92% of them rely on paper clinical records.(6)  
7 117 The most recent estimate (2009) states that there are approximately 630 primary health care centres  
8 118 throughout the country, or 21.2 centres per 100,000 people.(6)  
9 119

10 119  
11 120 Despite these health system challenges, the Government of Republic of Moldova is committed to  
12 121 improving primary health care capacity for NCDs. It is estimated that 60% of hypertension-related  
13 122 hospital admissions (about 12,000 annually) and 40% of diabetes-related hospitalizations (about  
14 123 5,000 annually) could be prevented through strengthened primary health care for these conditions,  
15 124 including better identification and management of those at increased CVD risk.(11)  
16 125

17 125  
18 126 Given the need and international policy support for addressing this gap in NCD care, there was a  
19 127 favourable window of opportunity to act with impact. As such, strengthening primary health care  
20 128 was set out as one of the main commitments in the Action Program of the Government of Republic  
21 129 of Moldova 2016–2018.(12) To do this requires the development of simplified clinical protocols,  
22 130 in-person training programs for nurses and doctors, and a core set of indicators to monitor and  
23 131 evaluate changes in the quality of care.  
24 132

### 25 132 26 133 **Essential interventions to prevent cardiovascular diseases in primary health care**

27 134 In order to build capacity in primary health care and ultimately prevent premature mortality from  
28 135 CVD in MDA, a study was envisioned to adapt and pilot the World Health Organization Package  
29 136 of Essential NCD Intervention from Primary Healthcare in Low Resource Settings (WHO  
30 137 PEN).(3) WHO PEN includes simplified clinical protocols which together cover the integrated  
31 138 management of hypertension and diabetes, as well as education and counselling on healthy  
32 139 behaviours aimed to prevent CVD. The central strategy of this integrated approach is the use of  
33 140 total cardiovascular risk assessment to stratify and target individuals at high CVD risk, a process  
34 141 considered to be a “best buy” intervention by the WHO.(5)  
35 142

36 142  
37 143 These interventions are aimed at tackling areas identified in a 2014 WHO assessment of challenges  
38 144 and opportunities for better NCD outcomes in Moldova. (13) This includes shortcomings amongst  
39 145 health workers in the identification and management of individuals with increased cardiovascular  
40 146 risk. The interventions are expected to add to the current quality of care by targeting interventions  
41 147 (non-pharmacological and/or pharmacological) to those at highest risk who stand to gain the most  
42 148 in absolute cardiovascular risk reduction, while also emphasizing improvements in the  
43 149 organization of care. The intervention also includes practical face-to-face training and follow-up  
44 150 implementation support. Current practice underutilizes these medical strategies and guidelines  
45 151 (e.g. CVD risk score directed primary prevention), in addition to limited task sharing with non-  
46 152 physician health works (e.g. nurses) in these care pathways. (13) At the study’s inception, there  
47 153 were no known developments beyond the scope of this project that could change clinical practice  
48 154 for NCDs in primary health care.  
49 155

50 155  
51 156 Since the use of WHO PEN was unprecedented in MDA, the Ministry of Health, Labour and Social  
52 157 Protection convened a national steering group to lead the adaptation and pilot process, with the  
53 158 goal of using the findings for future health systems development. Led by the primary health care  
54 159  
55 160

1  
2  
3 159 division of the Ministry of Health, the steering group is comprised of representatives from the  
4 160 Nicolae Testemitanu State University of Medicine and Pharmacy and the National Public Health  
5 161 Agency. The national steering group is supported by an international team of experts coordinated  
6 162 jointly by the WHO Regional Office for Europe and WHO Country Office in the Republic of  
7 163 Moldova.  
8 164

## 10 165 **AIM AND OBJECTIVES**

### 11 166 **Aim**

12 167  
13 168 The aim of the evaluation is to determine the feasibility of implementing and evaluating essential  
14 169 interventions for the prevention of cardiovascular disease in primary health care in MDA, with a  
15 170 view toward national scale-up.  
16 171

### 17 172 **Objectives**

#### 18 173 Primary Objectives

- 19 174 1. Assess the ability to implement MDA-adapted WHO PEN protocols one and two in pilot  
20 175 primary health care centres
- 21 176 2. Determine the feasibility of collecting quantitative data required for future studies of  
22 177 effectiveness from the existing informal paper clinical record system  
23 178

#### 24 179 Secondary Objectives

- 25 180 1. Determine the baseline performance of primary health care services with respect to  
26 181 essential interventions for the prevention and management of CVD
- 27 182 2. Estimate the change in performance of pilot primary health care centres after 12 months  
28 183 of protocol implementation and compare this to control clinics using usual care  
29 184

## 30 185 **METHODS AND ANALYSIS**

### 31 186 **Overview of Process and Design**

32 187  
33 188 An overview of the methods used to adapt, pilot, and evaluate essential interventions for CVD in  
34 189 primary health care in MDA are summarized by the following seven steps, which are planned to  
35 190 occur from September 2016 to May 2019.  
36 191

#### 37 192 Step One: Adaptation of WHO PEN Protocols to the National Context

38 193 Under the direction of the national steering group, WHO PEN protocols one and two will be  
39 194 compared and contrasted to national disease specific guidelines. The WHO PEN protocols will  
40 195 then be adapted to ensure consistency with the organization, culture, and availability of resources  
41 196 of the health system, while ensuring that they remain simple clinical decision support tools.  
42 197

#### 43 198 Step Two: Development of a Training Package for Primary Health Care Workers

44 199 A three-day training package will be developed under the direction of the national steering group  
45 200 in order to provide in-person theoretical and practical training to nurses and doctors working in  
46 201 primary health care. This will include lectures, clinical case studies, and practical exercises that  
47 202 embrace the experience and knowledge of participants.  
48 203

#### 49 204 Step Three: Collection of Baseline Data

205 According to the Ministry of Health process, a list of 20 primary health care clinics will be  
206 nominated and provided to the working group. They will then be randomized into an intervention  
207 group arm (n=10) and control arm (n=10). Data for quantitative indicators will be extracted from  
208 all 20 clinics by randomly sampling individual paper-based patient records from all primary health  
209 care units using a standardized data collection instrument. This will be done before randomization  
210 by a specially trained group of postgraduate medical trainees, such that neither the clinics nor the  
211 data extractors will know the allocation of each clinic to intervention or control arm.

#### 212 213 Step Four: Training Staff in Pilot Clinics

214 All doctors and nurses from the primary health care centres in the intervention arm will be invited  
215 to be trained together by a national team of experts in groups of approximately 30. It is estimated  
216 that up to 200 health workers will be trained in total. At the end of training each PHC team will  
217 pass through evaluation at the University Centre for Simulation in Medical Training using  
218 objective structured clinical exams and get feedback from trainers and peers.

#### 219 220 Step Five: Implementation of Protocols

221 Trained participants from the ten primary health care clinics in the intervention arm will then be  
222 free to implement the clinical protocols and change their clinical practice, without incentives, for  
223 12 months. During this time, a team of national experts will be created to offer support (distance  
224 and on-the-job) to the primary health care centres in the intervention arm. All ten clinics in the  
225 intervention arm will receive at least one in-person follow-up support visit.

#### 226 227 Step Six: Collection of Follow-up Data

228 After 12 months, using the same method and data collection instruments used to collect baseline  
229 quantitative data (Step Three), data will again be extracted from randomly selected individual  
230 paper-based patient records from all 20 health care centres. Five primary health care centres from  
231 the intervention arm will be selected by the national steering group for one-on-one semi structured  
232 interviews with health staff. This will be supplemented by inviting a selection of staff from all ten  
233 health centres in the intervention arm to participate in focus groups. Together, these qualitative  
234 data will be analysed thematically for explanatory themes.

#### 235 236 Step Seven: Evaluation of Results and Sharing Experience

237 The findings of the quantitative and qualitative analyses will be integrated in a final report and  
238 shared with key stakeholders, including health staff from the participating primary health care  
239 centres. The results will also be shared at a national conference and in an open-access peer  
240 reviewed journal, in order to inform the future development of primary health care capacity in  
241 MDA.

#### 242 243 **Methodological Design**

244 A pragmatic, sequential mixed methods explanatory design, composed of quantitative and  
245 qualitative strands of equal weight, will be used (Figure 1). This design was chosen because it  
246 allows for the use of qualitative data to enlighten and explain the quantitative findings, including  
247 but not limited to the feasibility of collecting data from paper-based records, the contextual factors  
248 affecting guideline implementation, changes in clinical practice, and optimization for the future.

249  
250 **Figure 1.** Illustration using the GATE frame structure (14) of the mixed methods evaluation design



251  
252 A sample size of 20 primary health care centres was chosen because it was seen as a good balance  
253 of allowing for variation in clinic geography and demography, while still remaining feasible for  
254 the pilot implementation. Half of the centres (n=10) will be randomly allocated to the intervention  
255 arm and half (n=10) to the control arm. Baseline data will be collected from both intervention and  
256 control clinics, ensuring that baseline data is collected before implementation occurs.

257  
258 Within clinic comparisons will be used to compare the 12 months before randomization with the  
259 12 months of implementation. Between clinics comparison will be used to compare the  
260 intervention clinics with control clinics during the same time period.

### 261 262 **Eligibility Criteria for Primary Health Care Centres**

263 Health facilities will be nominated by the Ministry of Health for participation based on the  
264 following eligibility criteria: (1) primary health care facilities must be operating in the public sector  
265 as legal entities; (2) primary health care facilities must be sampled in a way such that they are  
266 geographically distributed evenly across the country; equally from the Central, North and Southern  
267 regions of MDA; and (3) health facilities must be primary health care centres that are managed by  
268 family doctors with no specialist doctors working in the facility. These criteria were chosen in  
269 order to select a group of clinics that sufficiently reflect the majority of primary health care  
270 facilities in Moldova.

### 271 272 **Randomization**

273 The clinics will be stratified based on the ratio of patients to family doctors to minimize possible  
274 confounding by doctor caseload, and then randomized electronically into two groups of 10 primary  
275 health care centres.

### 276 277 **Comparison**

278 The 10 primary health care centres in the intervention arm will be compared to the 10 primary  
279 health care centres in the control arm. The control arm will receive no intervention and proceed  
280 with usual care.

### 281 282 **Quantitative Indicators**

283 Indicators were developed to balance input and process indicators, such as measurement of risk  
284 factors and calculation of risk scores, with output (e.g. prescribing) and outcome (e.g. blood  
285 pressure control) indicators. While one of the objectives of this evaluation is to determine the  
286 ability to measure these indicators based on routine paper records, we used our existing knowledge  
287 of the health system to design indicators which were valuable and likely to be feasible to calculate.  
288 Table 1 shows the indicator, the question the indicator seeks to answer, and the respective  
289 numerator and denominator definitions which will be used in the calculations.

290  
291 **Table 1.** Indicators, their numerators and denominators, and questions the indicators answer

### 292 293 **Data Collection and Management**

#### 294 295 Quantitative Data Collection Tool

1  
2  
3 296 A standardized data collection template has been developed for extracting anonymized patient data  
4 297 from individual paper records (Table 2). An online version was also made to allow for data entry  
5 298 on a computer or smartphone. It is estimated to take 15 minutes to extract data from one patient  
6 299 record since the records are made of blank paper with no formal structure or organization of health  
7 300 data.  
8 301

9 302 **Table 2.** Standardized data collection form used to extract data from individual patient records  
10 303

#### 11 304 Method of Randomly Sampling Patient Records

12 305 A random sample of the records of patients aged over 18, who have visited the medical facility  
13 306 within the past 12 months, will be taken. Since medical records in MDA are organized  
14 307 alphabetically on shelves, we created a randomly generated list of alphanumeric combinations that  
15 308 allowed for the selection of patient charts at random. For example, an alphanumeric code of “C24”  
16 309 would correspond to the 24<sup>th</sup> patient chart in the section of last names starting with the letter C.  
17 310

18 311 The list will be followed in the order that it was generated so as to prevent selection bias. The  
19 312 randomly selected chart will then be checked to see if it meets two inclusion criteria: (1) the patient  
20 313 is aged 18 years or older and (2) the patient visited the health centre within the last 12 months. If  
21 314 the record meets these criteria, data will then be extracted. If it does not, it will be returned to the  
22 315 shelf and the next alphanumeric code on the randomly generated list will be used. This process  
23 316 will be repeated in each clinic until a sample size of 1.2% of the patient population in each clinic  
24 317 is sampled. This proportion was chosen pragmatically such that the average sample per primary  
25 318 health care centre would equal 100 unique patients.  
26 319

#### 27 320 Data Analysis

28 321 The change in indicators from baseline to follow-up will be calculated for intervention clinics  
29 322 and compared with control clinics (Table 1). Subgroup analysis by age, gender, and other  
30 323 demographic features may be done as deemed appropriate by the national steering committee.  
31 324 All analyses will account for stratified sampling. Since the health centre is the unit of inference  
32 325 for the outcomes (e.g. health centre proportion of eligible patients with a documented CVD risk  
33 326 score), use of an intraclass correlation coefficient is not required for analyses of these  
34 327 outcomes. Age and gender adjusted logistic regression models will be used to analyse the  
35 328 differences in pre-defined indicators between intervention and control clinics and between  
36 329 baseline and follow-up. The differences in means of continuous variables between the  
37 330 intervention and control clinics and baseline and follow-up will be analysed using age and  
38 331 gender adjusted analysis of variance.  
39 332

#### 40 333 Qualitative Data Collection

##### 41 334 **Follow-up Support Visits**

42 335 Follow-up visits will be made to each intervention clinic at least once during the implementation  
43 336 timeframe (12 months) to provide ad hoc implementation support. These visits will be conducted  
44 337 by members of the national steering group, who will keep field notes about each visit and provide  
45 338 feedback and support to the health centres. The perspectives gained through follow-up support  
46 339 visits will be used by the national steering group to develop preliminary data collection tools for  
47 340 semi-structured interviews.  
48  
49  
50  
51  
52  
53  
54  
55  
56  
57  
58  
59

### 341 **Semi-Structured Interviews**

342 A maximum variation sample of half of the intervention clinics (n=5) will be chosen, based on the  
343 perceived performance of each clinic by the evaluation steering committee. A pragmatic sample  
344 of clinic managers (n=1 per clinic), doctors (n=3 per clinic), and nurses (n=3 per clinic) will be  
345 interviewed one-on-one, using a semi-structured format. Interviews will proceed until data  
346 saturation has been reached, to a maximum of 30 interviews. After obtaining written, informed  
347 consent, interviews will be of 30 to 60 minutes in length, audio recorded, and be transcribed  
348 verbatim and analysed thematically using framework thematic analysis.(15) The interviews will  
349 be conducted by members of the steering group, but the interviewers will be allocated to  
350 participants from health centres with whom they did not provide follow-up support visits.

### 351 **Focus Group Workshop**

352 Participants from all ten implementation clinics will be invited to a workshop to further collect  
353 explanatory qualitative data and to critically reflect on the implementation process. Participants  
354 will be a mix of doctors, nurses, and managers from the intervention clinics.

356 Participants will be placed into small groups based on their profession, and asked to complete a  
357 standardized worksheet. Each group will be under the guidance of a facilitator, and emergent  
358 themes from one-one-one interviews will be used as prompts to each group. The worksheet will  
359 allow for each group to directly comment, modify, or add to the emergent themes, create new  
360 themes, and organize themes into categories such as barriers and facilitators.

### 362 Integration of Quantitative and Qualitative Strands

363 The resulting qualitative data will be analysed thematically using the framework approach, and  
364 used to help explain the findings of the quantitative strand.(15) Following the sequential mixed  
365 method design, integration of the qualitative findings with quantitative findings will allow for the  
366 interpretation of the results in light of each other. This may include post-hoc analysis of  
367 effectiveness of some of the quantitative outcomes as appropriate, to further add meaning to the  
368 integration of qualitative and quantitative strands.

### 369 **Patient and Public Involvement**

370 Neither patients nor the public were involved in the methodological design.

## 373 **ETHICS AND DISSEMINATION**

### 374 **Ethical Review and Approval**

375 This project was reviewed by the Research Ethics Committee of the Nicolae Testemitanu State  
376 University of Medicine and Pharmacy of the Republic of Moldova and granted permission on 31  
377 May 2017.

### 379 **Dissemination**

380 Quantitative findings will be summarized and presented back to all intervention clinics during  
381 follow-up workshops. A comprehensive project report will be written and shared with key  
382 stakeholders. A final report of key findings of the evaluation will be written and submitted to an  
383 open access peer-reviewed journal and made available to all study participants so they can use the  
384 findings to improve their practice. The findings will be used to evaluate the feasibility of a national  
385 scale-up of essential NCD interventions in primary health care in MDA.

1  
2  
3 386  
4 387  
5  
6 388  
7 389  
8 390  
9 391  
10 392  
11 393  
12 394  
13 395  
14 396  
15 397  
16 398  
17 399  
18 400  
19 401  
20 402  
21 403  
22 404  
23 405  
24 406  
25 407  
26 408  
27 409  
28 410  
29 411  
30 412  
31 413  
32 414  
33 415  
34 416  
35 417  
36 418  
37 419  
38 420  
39 421  
40 422  
41 423  
42 424  
43 425  
44 426  
45 427  
46 428  
47 429  
48 430  
49 431  
50  
51  
52  
53  
54  
55  
56  
57  
58  
59  
60

## REFERENCES

1. Benziger CP, Roth GA, Moran AE. The Global Burden of Disease Study and the Preventable Burden of NCD. *Glob Heart*. 2016 Dec;11(4):393–7.
2. World Health Organization (WHO). World Health Statistics [Internet]. 2018. Available from: [http://www.who.int/gho/publications/world\\_health\\_statistics/2018/en/](http://www.who.int/gho/publications/world_health_statistics/2018/en/)
3. World Health Organization (WHO). Package of Essential Noncommunicable (PEN) disease interventions for primary health care in low-resource settings [Internet]. 2013. Available from: [http://www.who.int/ncds/management/pen\\_tools/en/](http://www.who.int/ncds/management/pen_tools/en/)
4. World Health Organization (WHO). Global action plan for the prevention and control of NCDs 2013-2020. 2013.
5. Organization WH. Tackling NCDs: “Best buys” and other recommended interventions for the prevention and control of noncommunicable diseases [Internet]. 2017. Available from: <http://www.who.int/ncds/management/best-buys/en/>
6. World Health Organization (WHO). Evaluation of the structure and provision of primary care in the Republic of Moldova. 2012.
7. National Center for Health Management. Health Yearbook: Public Health in Moldova [Internet]. 2015. Available from: <http://www.cnms.md/ro/rapoarte>
8. World Health Organization. Global Health Observatory data repository [Internet]. [cited 2018 Jul 10]. Available from: <http://apps.who.int/gho/data/node.home>
9. World Health Organization (WHO). Prevalence of Noncommunicable Disease Risk Factors in the Republic of Moldova (STEPS) [Internet]. 2014. Available from: [http://www.who.int/ncds/surveillance/steps/Moldova\\_2013\\_STEPS\\_Report.pdf](http://www.who.int/ncds/surveillance/steps/Moldova_2013_STEPS_Report.pdf)
10. Turcanu C, Domente S, Buga M, Richardson E. Health Systems in Transition: Republic of Moldova [Internet]. 2012. Available from: [http://www.euro.who.int/\\_\\_data/assets/pdf\\_file/0006/178053/HiT-Moldova.pdf](http://www.euro.who.int/__data/assets/pdf_file/0006/178053/HiT-Moldova.pdf)
11. World Health Organization (WHO). Ambulatory care sensitive conditions in the Republic of Moldova [Internet]. 2015. Available from: <http://www.euro.who.int/en/countries/republic-of-moldova/publications/ambulatory-care-sensitive-conditions-in-the-republic-of-moldova-2015>
12. Government of the Republic of Moldova. Action Program of the Government of the Republic of Moldova 2016–2018 [Internet]. 2016. Available from: [http://gov.md/sites/default/files/document/attachments/guvernul\\_republicii\\_moldova\\_-\\_programul\\_de\\_activitate\\_al\\_guvernului\\_republicii\\_moldova\\_2016-2018.pdf](http://gov.md/sites/default/files/document/attachments/guvernul_republicii_moldova_-_programul_de_activitate_al_guvernului_republicii_moldova_2016-2018.pdf)
13. World Health Organization Regional Office for Europe. Better noncommunicable disease outcomes: challenges and opportunities for health systems -- Country Assessment of Republic of Moldova [Internet]. Copenhagen; 2014. Available from: [http://www.euro.who.int/\\_\\_data/assets/pdf\\_file/0008/255464/BetterNCDoutcomesChallengesOpportunitiesHealthSystemsMoldovaCountryAssessmentEng.pdf?ua=1](http://www.euro.who.int/__data/assets/pdf_file/0008/255464/BetterNCDoutcomesChallengesOpportunitiesHealthSystemsMoldovaCountryAssessmentEng.pdf?ua=1)
14. Jackson R, Ameratunga S, Broad J, Connor J, Lethaby A, Robb G, et al. The GATE frame: critical appraisal with pictures. Vol. 144, ACP journal club. United States; 2006. p. A8-11.
15. Gale NK, Heath G, Cameron E, Rashid S, Redwood S. Using the framework method for the analysis of qualitative data in multi-disciplinary health research. *BMC Med Res Methodol*. 2013 Sep;13:117.

1  
2  
3 432 **AUTHORS AND CONTRIBUTIONS**

4 433 DC, AC, TL, GC, VS, TZ, AA, and JF contributed to the methodological design. DC, AC, TL, and  
5 434 JF contributed to writing the manuscript.

6 435

7  
8 436 **FUNDING STATEMENT**

9 437 This study is funded jointly by the Swiss Agency for Development and Cooperation (SDC) and WHO  
10 438 Regional Office for Europe.

11 439

12 440 **COMPETING INTERESTS STATEMENT**

13 441 DC, AC, TL, GC, VS, TZ, AA, JF declare no competing interests.

14 442  
15  
16  
17  
18  
19  
20  
21  
22  
23  
24  
25  
26  
27  
28  
29  
30  
31  
32  
33  
34  
35  
36  
37  
38  
39  
40  
41  
42  
43  
44  
45  
46  
47  
48  
49  
50  
51  
52  
53  
54  
55  
56  
57  
58  
59  
60

443 **Table 1.** Indicators, their numerators and denominators, and questions the indicators answer

| Question                                                                                                                         | Indicator                                                                                                                                                                                                                                            | Numerator                                                                                                                                                                                                                                                                                                                                                                                                                                                                  | Denominator                                                                                                                                                                                                                                                                                                                                                                                                                                           |
|----------------------------------------------------------------------------------------------------------------------------------|------------------------------------------------------------------------------------------------------------------------------------------------------------------------------------------------------------------------------------------------------|----------------------------------------------------------------------------------------------------------------------------------------------------------------------------------------------------------------------------------------------------------------------------------------------------------------------------------------------------------------------------------------------------------------------------------------------------------------------------|-------------------------------------------------------------------------------------------------------------------------------------------------------------------------------------------------------------------------------------------------------------------------------------------------------------------------------------------------------------------------------------------------------------------------------------------------------|
| Are risk factors being measured?                                                                                                 | Proportion of eligible patients who have all risk factor values recorded as required for calculation of risk score                                                                                                                                   | Patients aged 40 or older who have visited in the last 12 months who have all measurements required for calculation of risk score within 12 months of the most recent date of visit                                                                                                                                                                                                                                                                                        | Patients aged 40 or older who have visited in the last 12 months                                                                                                                                                                                                                                                                                                                                                                                      |
| Are risk factor measurements being converted to a total risk score?                                                              | Proportion of patients aged 40 or older who have visited in the last 12 months who have all measurements required for calculation of risk score within 12 months of the most recent date of visit, that have a documented risk score                 | Patients aged 40 or older who have visited in the last 12 months who have all measurements required for calculation of risk score within 12 months of the most recent date of visit, that have a documented risk score                                                                                                                                                                                                                                                     | Patients aged 40 or older who have visited in the last 12 months who have all measurements required for calculation of risk score within 12 months of the most recent date of visit                                                                                                                                                                                                                                                                   |
| Are risk scores calculated correctly?                                                                                            | Proportion of patients aged 40 or older who have visited in the last 12 months who have all measurements required for calculation of risk score within 12 months of the most recent date of visit, that have a documented risk score that is correct | Patients aged 40 or older who have visited in the last 12 months who have all measurements required for calculation of risk score within 12 months of the most recent date of visit, that have a documented risk score that is correct                                                                                                                                                                                                                                     | Patients aged 40 or older who have visited in the last 12 months who have all measurements required for calculation of risk score within 12 months of the most recent date of visit, that have a documented risk score                                                                                                                                                                                                                                |
| Are patients being risk scored?                                                                                                  | Proportion of eligible patients with a documented risk score                                                                                                                                                                                         | Patients aged 40 or older who have visited in the last 12 months with a documented risk score                                                                                                                                                                                                                                                                                                                                                                              | Patients aged 40 or older who have visited in the last 12 months                                                                                                                                                                                                                                                                                                                                                                                      |
| Are risk scores calculated correctly?                                                                                            | Proportion of eligible patients with a documented risk score that is correct                                                                                                                                                                         | Patients aged 40 or older who have visited in the last 12 months with a documented risk score that is correct                                                                                                                                                                                                                                                                                                                                                              | Patients aged 40 or older who have visited in the last 12 months with a documented risk score                                                                                                                                                                                                                                                                                                                                                         |
| Are statins prescribed to the correct patients?                                                                                  | Proportion of eligible patients prescribed a statin                                                                                                                                                                                                  | Patients with existing CVD, diabetics 40 or older with high LDL values (as defined based on total CVD risk of SCORE 10-14% in LDL $\geq$ 2.6 mmol/L; with very high risk SCORE $\geq$ 15% in LDL $\geq$ 1.8 mmol/L), or patients with a SCORE of $\leq$ 9% and LDL $\geq$ 2.6 or total cholesterol $\geq$ 7.2, or patients with a SCORE of 10-14% and a LDL $\geq$ 1.8 or total cholesterol $\geq$ 7.2 mmol/L, or patients with a SCORE of $\geq$ 15%, prescribed a statin | Patients with existing CVD, diabetics 40 or older with high LDL values (as defined based on total CVD risk of SCORE 10-14% in LDL $\geq$ 2.6 mmol/L; with very high risk SCORE $\geq$ 15% in LDL $\geq$ 1.8 mmol/L), or patients with a SCORE of $\leq$ 9% and LDL $\geq$ 2.6 or total cholesterol $\geq$ 7.2, or patients with a SCORE of 10-14% and a LDL $\geq$ 1.8 or total cholesterol $\geq$ 7.2 mmol/L, or patients with a SCORE of $\geq$ 15% |
| Are statins prescribed correctly based on documented risk score?                                                                 | Proportion of patients eligible based on documented risk score prescribed a statin                                                                                                                                                                   | Patients with a documented risk score as very high risk SCORE $\geq$ 15% prescribed a statin                                                                                                                                                                                                                                                                                                                                                                               | Patients with a documented risk score as very high risk SCORE $\geq$ 15%                                                                                                                                                                                                                                                                                                                                                                              |
| Are patients with existing disease, who do not require the calculation of a risk score to prescribe statins, prescribed statins? | Proportion of patients with existing CVD prescribed a statin                                                                                                                                                                                         | Patients with existing CVD prescribed a statin                                                                                                                                                                                                                                                                                                                                                                                                                             | Patients with existing CVD                                                                                                                                                                                                                                                                                                                                                                                                                            |

|                                                                             |                                                                                                                                                 |                                                                                                                                                                     |                                                                                                      |
|-----------------------------------------------------------------------------|-------------------------------------------------------------------------------------------------------------------------------------------------|---------------------------------------------------------------------------------------------------------------------------------------------------------------------|------------------------------------------------------------------------------------------------------|
| Is the blood pressure of high risk patients controlled?                     | Proportion of high risk patients (SCORE $\geq$ 15% or DM and age over 40) whose last two recorded blood pressure measurements were <130/80 mmHg | Patients with a true risk score indicating a very high risk (SCORE $\geq$ 15%) or DM and age over 40 whose last two documented blood pressure readings were <130/80 | Patients with a true risk score indicating a very high risk (SCORE $\geq$ 15%) or DM and age over 40 |
| Is the blood pressure of lower risk patients controlled?                    | Proportion of lower risk patients (SCORE <15%) whose last two recorded blood pressure measurements were <140/90 mmHg                            | Patients with a true risk score indicating <15% whose last two documented blood pressure readings were <140/90                                                      | Patients with a true risk score indicating <15%                                                      |
| Are patients with existing CVD prescribed basic medications to reduce risk? | Proportion of patients with existing CVD prescribed a statin and aspirin and blood pressure lowering treatment                                  | Patients with existing CVD prescribed a statin and aspirin and blood pressure lowering treatment                                                                    | Patients with existing CVD                                                                           |
| Is the blood glucose of diabetic patients controlled?                       | Proportion of diabetic patients with glycaemic control as defined by last two HbA1c measurements                                                | Patients with diabetes 2 whose last two HbA1c measurements were below personal target as defined by MDA adapted WHO PEN 1                                           | Patients with diabetes type 2                                                                        |
| Is the blood pressure of hypertensive patients controlled?                  | Proportion of confirmed hypertensive patients whose SBP is <140/90 at last two visits                                                           | Patients with confirmed hypertension whose last two blood pressure readings were <140/90                                                                            | Patients with confirmed hypertension                                                                 |
| What is the prevalence of high blood pressure?                              | Proportion of people whose last two systolic blood pressure reading are 140 mmHg or above                                                       | Patients whose last two systolic blood pressure readings were $\geq$ 140                                                                                            | All patients over 18                                                                                 |

444  
445  
446

447 **Table 2.** Standardized data collection form used to extract data from individual patient records  
 448

| <b>Data Collection Question</b>                                                                               | <b>Answer</b> |
|---------------------------------------------------------------------------------------------------------------|---------------|
| What is your name? (Name of person extracting data)                                                           |               |
| Date of Data Extraction (MM-DD-YYYY)                                                                          |               |
| Write the Clinic Name                                                                                         |               |
| Is this a duplicate extraction?                                                                               |               |
| If it is a duplicate extraction, enter the number you and your extraction partner have assigned to this file. |               |
| Date of Birth (MM-DD-YYYY)                                                                                    |               |
| Sex (M/F)                                                                                                     |               |
| Smoking Status (Y/M)                                                                                          |               |
| Diagnosis of Hypertension (Y/N)                                                                               |               |
| Date of Hypertension Diagnosis (MM-DD-YYYY)                                                                   |               |
| Can you find one or more blood pressure readings? (Y/N)                                                       |               |
| Most Recent Systolic Blood Pressure                                                                           |               |
| Most Recent Diastolic Blood Pressure                                                                          |               |
| Date of the Most Recent Blood Pressure Measurement (MM-DD-YYYY)                                               |               |
| Can you find a second most recent blood pressure reading? (Y/N)                                               |               |
| Second most recent systolic blood pressure                                                                    |               |
| Second most recent diastolic blood pressure                                                                   |               |
| Date of the second most recent systolic blood pressure (MM-DD-YYYY)                                           |               |
| Diagnosis of Diabetes (Type 1, Type 2, No)                                                                    |               |
| Can you find one or more HbA1c measurements? (Y/N)                                                            |               |
| Most recent HbA1c reading (mmol/mol)                                                                          |               |
| Date of the most recent HbA1c measurement? (MM-DD-YYYY)                                                       |               |
| Can you find another HbA1c measurement? (Y/N)                                                                 |               |
| Second most recent HbA1c reading (mmol/mol, otherwise specify unit)                                           |               |
| Date of the second most recent HbA1c reading? (MM-DD-YYYY)                                                    |               |
| Can you find one or more total cholesterol measurements? (Y/N)                                                |               |
| Most recent total cholesterol reading (mmol/L)                                                                |               |
| Date of the most recent cholesterol reading (MM-DD-YYYY)                                                      |               |
| Can you find another cholesterol measurement? (Y/N)                                                           |               |
| Second most recent cholesterol reading (mmol/L)                                                               |               |
| Date of the second most recent cholesterol reading (MM-DD-YYYY)                                               |               |
| Was the patient prescribed a statin? (Y/N)                                                                    |               |
| What was the date of the statin prescription? (MM-DD-YYYY)                                                    |               |



|    |                                                                                                                                                                                                                                          |
|----|------------------------------------------------------------------------------------------------------------------------------------------------------------------------------------------------------------------------------------------|
| 1  |                                                                                                                                                                                                                                          |
| 2  |                                                                                                                                                                                                                                          |
| 3  | What was the drug and dose?                                                                                                                                                                                                              |
| 4  | Does the patient have existing CVD? (Y/N)                                                                                                                                                                                                |
| 5  | State the type of CVD                                                                                                                                                                                                                    |
| 6  | Has the patient been prescribed acetylsalicylic acid (ASA or aspirin)? (Y/N)                                                                                                                                                             |
| 7  | What was the most recent date that ASA was prescribed? (MM-DD-YYYY)                                                                                                                                                                      |
| 8  | Has the patient been prescribed anti-hypertensives? (Y/N)                                                                                                                                                                                |
| 9  | What was the most recent date that anti-hypertensives were prescribed? (MM-DD-YYYY)                                                                                                                                                      |
| 10 | Can you find a documented ESC SCORE risk score? (Y/N)                                                                                                                                                                                    |
| 11 | Enter the most recent documented ESC SCORE risk score (%)                                                                                                                                                                                |
| 12 | What was the date the risk score was documented? (MM-DD-YYYY)                                                                                                                                                                            |
| 13 | Please record any important notes about the data extraction here. Examples include an error you think may have been made, clarification of the units for measurements (e.g. mmol/L vs mg/dL). Or notes that you would like for yourself. |
| 14 |                                                                                                                                                                                                                                          |
| 15 |                                                                                                                                                                                                                                          |
| 16 |                                                                                                                                                                                                                                          |
| 17 |                                                                                                                                                                                                                                          |
| 18 |                                                                                                                                                                                                                                          |
| 19 |                                                                                                                                                                                                                                          |
| 20 |                                                                                                                                                                                                                                          |
| 21 |                                                                                                                                                                                                                                          |
| 22 |                                                                                                                                                                                                                                          |
| 23 |                                                                                                                                                                                                                                          |
| 24 |                                                                                                                                                                                                                                          |
| 25 |                                                                                                                                                                                                                                          |
| 26 |                                                                                                                                                                                                                                          |
| 27 |                                                                                                                                                                                                                                          |
| 28 |                                                                                                                                                                                                                                          |
| 29 |                                                                                                                                                                                                                                          |
| 30 |                                                                                                                                                                                                                                          |
| 31 |                                                                                                                                                                                                                                          |
| 32 |                                                                                                                                                                                                                                          |
| 33 |                                                                                                                                                                                                                                          |
| 34 |                                                                                                                                                                                                                                          |
| 35 |                                                                                                                                                                                                                                          |
| 36 |                                                                                                                                                                                                                                          |
| 37 |                                                                                                                                                                                                                                          |
| 38 |                                                                                                                                                                                                                                          |
| 39 |                                                                                                                                                                                                                                          |
| 40 |                                                                                                                                                                                                                                          |
| 41 |                                                                                                                                                                                                                                          |
| 42 |                                                                                                                                                                                                                                          |
| 43 |                                                                                                                                                                                                                                          |
| 44 |                                                                                                                                                                                                                                          |
| 45 |                                                                                                                                                                                                                                          |
| 46 |                                                                                                                                                                                                                                          |
| 47 |                                                                                                                                                                                                                                          |
| 48 |                                                                                                                                                                                                                                          |
| 49 |                                                                                                                                                                                                                                          |
| 50 |                                                                                                                                                                                                                                          |
| 51 |                                                                                                                                                                                                                                          |
| 52 |                                                                                                                                                                                                                                          |
| 53 |                                                                                                                                                                                                                                          |
| 54 |                                                                                                                                                                                                                                          |
| 55 |                                                                                                                                                                                                                                          |
| 56 |                                                                                                                                                                                                                                          |
| 57 |                                                                                                                                                                                                                                          |
| 58 |                                                                                                                                                                                                                                          |
| 59 |                                                                                                                                                                                                                                          |
| 60 |                                                                                                                                                                                                                                          |

449

1  
2  
3  
4  
5  
6  
7  
8  
9  
10  
11  
12  
13  
14  
15  
16  
17  
18  
19  
20  
21  
22  
23  
24  
25  
26  
27  
28  
29  
30  
31  
32  
33  
34  
35  
36  
37  
38  
39  
40  
41  
42  
43  
44  
45  
46  
47  
48  
49  
50  
51  
52  
53  
54  
55  
56  
57  
58  
59  
60

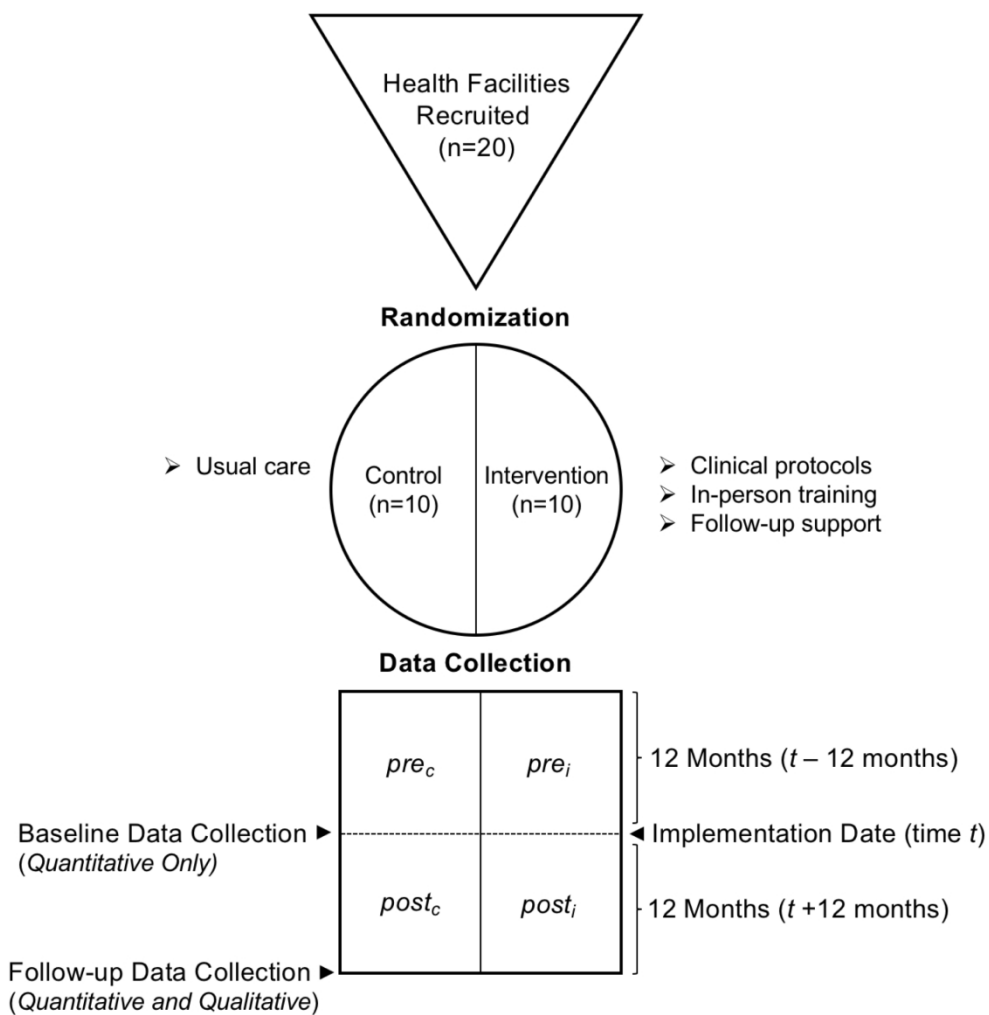

Figure 1. Illustration using the GATE frame structure (14) of the mixed methods evaluation design

184x193mm (300 x 300 DPI)

# BMJ Open

## Protocol for the Evaluation of a Pilot Implementation of Essential Interventions for the Prevention of Cardiovascular Diseases in Primary Health Care in the Republic of Moldova

|                                 |                                                                                                                                                                                                                                                                         |
|---------------------------------|-------------------------------------------------------------------------------------------------------------------------------------------------------------------------------------------------------------------------------------------------------------------------|
| Journal:                        | <i>BMJ Open</i>                                                                                                                                                                                                                                                         |
| Manuscript ID                   | bmjopen-2018-025705.R2                                                                                                                                                                                                                                                  |
| Article Type:                   | Protocol                                                                                                                                                                                                                                                                |
| Date Submitted by the Author:   | 02-Jun-2019                                                                                                                                                                                                                                                             |
| Complete List of Authors:       | Collins, Dylan; University of British Columbia, Ciobanu, Angela<br>Laatikainen, Tiina; National Institute for Health and Welfare, Epidemiology and Health Promotion<br>Curocichin, Ghenadie<br>Salaru, Virginia<br>Zatic, Tatiana<br>Anisei, Angela<br>Farrington, Jill |
| <b>Primary Subject Heading</b>: | Cardiovascular medicine                                                                                                                                                                                                                                                 |
| Secondary Subject Heading:      | Public health                                                                                                                                                                                                                                                           |
| Keywords:                       | Cardiology < INTERNAL MEDICINE, PRIMARY CARE, Quality in health care < HEALTH SERVICES ADMINISTRATION & MANAGEMENT, Protocols & guidelines < HEALTH SERVICES ADMINISTRATION & MANAGEMENT                                                                                |
|                                 |                                                                                                                                                                                                                                                                         |

SCHOLARONE™  
Manuscripts

1  
2  
3 **1 Protocol for the Evaluation of a Pilot Implementation of Essential Interventions for the**  
4 **2 Prevention of Cardiovascular Diseases in Primary Health Care in the Republic of Moldova**  
5  
6  
7

8 5 Dylan R. J. Collins<sup>1</sup>, Angela Ciobanu<sup>2</sup>, Tiina Laatikainen<sup>3</sup>, Ghenadie Curocichin<sup>4</sup>, Virginia  
9 6 Salaru<sup>4</sup>, Tatiana Zatic<sup>5</sup>, Angela Anisei<sup>6</sup>, Jill L. Farrington<sup>7</sup>  
10 7  
11 8

12 9 <sup>1</sup>University of British Columbia, Vancouver, Canada

13 10 <sup>2</sup>World Health Organization Country Office in Republic of Moldova, Chisinau, Republic of  
14 11 Moldova

15 12 <sup>3</sup>Institute of Public Health and Clinical Nutrition, Helsinki, Finland

16 13 <sup>4</sup>Family Medicine Department, Nicolae Testemitanu State Medical and Pharmaceutical  
17 14 University, Chisinau, Republic of Moldova

18 15 <sup>5</sup>Primary, Emergency and Community Health Policies Department, Ministry of Health, Labour  
19 16 and Social Protection, Chisinau, Republic of Moldova

20 17 <sup>6</sup>Department on Quality Management of Health Services, National Public Health Agency,  
21 18 Republic of Moldova

22 19 <sup>7</sup>World Health Organization Regional Office for Europe, Copenhagen, Denmark  
23 20  
24 21

25 22  
26 21 Correspondence to Dr. Dylan Collins at [dylan.collins@alumni.ubc.ca](mailto:dylan.collins@alumni.ubc.ca)  
27  
28  
29  
30  
31  
32  
33  
34  
35  
36  
37  
38  
39  
40  
41  
42  
43  
44  
45  
46  
47  
48  
49  
50  
51  
52  
53  
54  
55  
56  
57  
58  
59  
60

## 23 ABSTRACT

### 25 Introduction

26 Nearly 90% of all deaths in Republic of Moldova are caused by NCDs, the majority of which  
27 (55%) are caused by CVD. In addition to reducing premature mortality from CVD, it is estimated  
28 that strengthening primary health care could cut the number hypertension-related hospital  
29 admissions and diabetes-related hospitalizations in half. The aim of this evaluation is to determine  
30 the feasibility of implementing and evaluating essential interventions for the prevention of CVD  
31 in primary health care in Republic of Moldova, with a view toward national scale-up.

### 33 Methods and Analysis

34 A national steering group including international experts will be convened to adapt WHO PEN  
35 protocols one and two to the health system of Republic of Moldova, develop and conduct training  
36 of primary health care workers, and test a core set of indicators to monitor the quality of care and  
37 change in clinical practice. To evaluate the impact of this pilot implementation, a pragmatic,  
38 sequential mixed methods explanatory design, composed of quantitative and qualitative strands of  
39 equal weight, will be used. Twenty primary health care centres will be selected and randomized to  
40 the training and implementation arm (n=10) and the usual care arm (n=10). At baseline and 12  
41 months follow-up, a standardized data collection form will be piloted to extract data directly from  
42 patient paper records in order to estimate the change in clinical practice. Semi-structured  
43 interviews and inter-clinic peer workshops will be conducted at 12 months follow-up, and  
44 qualitative data collected from these formats will be analysed thematically for explanatory themes  
45 that relate to the quantitative findings.

### 47 Ethics and Dissemination

48 Ethical review and approval has been obtained. Findings of the evaluation will be shared in a  
49 project report to key stakeholders, presented back to participants, and written into a manuscript for  
50 an open access peer-reviewed scientific journal.

## 53 STRENGTHS AND LIMITATIONS OF THIS STUDY

- 55 • To our knowledge, this is the first description of adapting and piloting WHO essential NCD  
56 interventions in primary health care in a low- or middle-income country and provides a  
57 methodological example to other jurisdictions
- 58 • A mixed methods design allows for a greater understanding of the potential barriers and  
59 facilitators to implementation and can inform future health systems development
- 60 • Primary health care facilities will be selected from different regions of Republic of  
61 Moldova in order to pilot implementation in a variety of contexts throughout the country
- 62 • Since this is an evaluation of a pilot implementation, the sample size is based on  
63 pragmatism and not statistical power
- 64 • We are unable to include patient perspectives and experience in the evaluation, which is an  
65 important aspect of health care quality

## 67 INTRODUCTION

68  
69 Globally, non-communicable diseases (NCDs) account for more than one-half of the global burden  
70 of disease.(1) In 2016, an estimated 41 million deaths were due to NCDs, of which nearly half  
71 were due to cardiovascular diseases (CVD).(2) Primary health care systems play an important role  
72 in the prevention, early detection, and appropriate management of these diseases, but many nations  
73 lack primary health care capacity.(3,4)

74  
75 To support national governments to realize their commitments in reducing the burden of NCDs,  
76 as agreed in the United Nations Political Declaration on NCDs, the World Health Assembly  
77 endorsed the WHO Global Action Plan for the Prevention and Control of NCDs 2013-2020. To  
78 support implementation of this Action Plan, WHO has identified a set of cost-effective policy  
79 options (“best buys”) for the prevention and control of NCDs within countries.(5)

80  
81 The Republic of Moldova (henceforth “MDA”) is located in Eastern Europe, between Ukraine and  
82 Romania; the Capital and largest city is Chisinau. By gross domestic product per capita, MDA is  
83 one of the poorest countries in the WHO European Region and it is estimated that 21.9% of citizens  
84 live below the absolute poverty line of 1 US Dollar per day.(6)

### 86 **Non-communicable diseases are a leading cause of death in MDA**

87 While NCDs are a global epidemic, MDA ranks amongst the countries most affected. Nearly 90%  
88 of all deaths in MDA are caused by NCDs, the majority of which (55%) are caused by CVD.(7)  
89 In 2016, the probability of dying prematurely from any of the four major NCDs (CVDs, cancer,  
90 diabetes, chronic respiratory disease) was 24.9%,; almost twice as high for men (33.7%) as women  
91 (17.3%).(8) Men and people residing in rural areas are disproportionately impacted by CVD and  
92 represent key populations for public health intervention.(7)

93  
94 This burden is driven by some of the highest rates of NCD risk factors, including tobacco and  
95 alcohol use, in the WHO European region indicated by a 2013 STEPS survey.(9) One-in-four  
96 (25.3%) Moldovans smoke tobacco and this rate nearly doubles in men.(9) Among adults aged 18  
97 to 69, 61.9% currently consume alcohol and one in five people have engaged in heavy episodic  
98 drinking (six or more drinks on any one occasion in the past 30 days).(9)

99  
100 The overall prevalence of obesity amongst adults is 22.9%, being higher among women (28.5%)  
101 as compared with men (17.8%).(9) The prevalence of raised blood pressure (defined as SBP  $\geq$   
102 140 mmHg and/or DBP  $\geq$  90 mmHg or currently taking medication for raised blood pressure)  
103 among MDA’s adult population is 39.8%, and 76.2% of these patients are not on blood pressure  
104 lowering medication.(9) A total of 12.3% of the population have a blood glucose level of  $\geq$  6.1  
105 mmol/L, and 29.4% of the population has a total blood cholesterol level of  $\geq$  5 mmol/L.(9) It is  
106 estimated that one in five (23.0%) people aged 40–69 years have a 10-year fatal or non-fatal CVD  
107 risk of over 30% (including those with an existing CVD).(9)

### 109 **Primary health care in MDA and commitment to NCDs**

110 According to the Constitution of Republic of Moldova of 1994, citizens are entitled to a free of  
111 charge minimum package of essential health services, including primary health care. However,  
112 resource constraints have made it difficult to offer these services and significant gaps in care

1  
2  
3 113 exist.(10) According to the most recent data (2010), there were 5.3 family doctors per 10,000  
4 114 inhabitants and 25.9 specialist doctors per 10,000 inhabitants. In rural areas these rates are halved,  
5 115 leading to human resource shortages in primary care.(10) Approximately 17% of practicing  
6 116 physicians in MDA work in primary health care, and 92% of them rely on paper clinical records.(6)  
7 117 The most recent estimate (2009) states that there are approximately 630 primary health care centres  
8 118 throughout the country, or 21.2 centres per 100,000 people.(6)  
9 119

10 119  
11 120 Despite these health system challenges, the Government of Republic of Moldova is committed to  
12 121 improving primary health care capacity for NCDs. It is estimated that 60% of hypertension-related  
13 122 hospital admissions (about 12,000 annually) and 40% of diabetes-related hospitalizations (about  
14 123 5,000 annually) could be prevented through strengthened primary health care for these conditions,  
15 124 including better identification and management of those at increased CVD risk.(11)  
16 125

17 125  
18 126 Given the need and international policy support for addressing this gap in NCD care, there was a  
19 127 favourable window of opportunity to act with impact. As such, strengthening primary health care  
20 128 was set out as one of the main commitments in the Action Program of the Government of Republic  
21 129 of Moldova 2016–2018.(12) To do this requires the development of simplified clinical protocols,  
22 130 in-person training programs for nurses and doctors, and a core set of indicators to monitor and  
23 131 evaluate changes in the quality of care.  
24 132

### 25 132 26 133 **Essential interventions to prevent cardiovascular diseases in primary health care**

27 134 In order to build capacity in primary health care and ultimately prevent premature mortality from  
28 135 CVD in MDA, a study was envisioned to adapt and pilot the World Health Organization Package  
29 136 of Essential NCD Intervention from Primary Healthcare in Low Resource Settings (WHO  
30 137 PEN).(3) WHO PEN includes simplified clinical protocols which together cover the integrated  
31 138 management of hypertension and diabetes, as well as education and counselling on healthy  
32 139 behaviours aimed to prevent CVD. The central strategy of this integrated approach is the use of  
33 140 total cardiovascular risk assessment to stratify and target individuals at high CVD risk, a process  
34 141 considered to be a “best buy” intervention by the WHO.(5)  
35 142

36 142  
37 143 These interventions are aimed at tackling areas identified in a 2014 WHO assessment of challenges  
38 144 and opportunities for better NCD outcomes in Moldova. (13) This includes shortcomings amongst  
39 145 health workers in the identification and management of individuals with increased cardiovascular  
40 146 risk. The interventions are expected to add to the current quality of care by targeting interventions  
41 147 (non-pharmacological and/or pharmacological) to those at highest risk who stand to gain the most  
42 148 in absolute cardiovascular risk reduction, while also emphasizing improvements in the  
43 149 organization of care. The intervention also includes practical face-to-face training and follow-up  
44 150 implementation support. Current practice underutilizes these medical strategies and guidelines  
45 151 (e.g. CVD risk score directed primary prevention), in addition to limited task sharing with non-  
46 152 physician health works (e.g. nurses) in these care pathways. (13) At the study’s inception, there  
47 153 were no known developments beyond the scope of this project that could change clinical practice  
48 154 for NCDs in primary health care.  
49 155

50 154  
51 155  
52 156 Since the use of WHO PEN was unprecedented in MDA, the Ministry of Health, Labour and Social  
53 157 Protection convened a national steering group to lead the adaptation and pilot process, with the  
54 158 goal of using the findings for future health systems development. Led by the primary health care  
55 159  
56  
57  
58  
59  
60

1  
2  
3 159 division of the Ministry of Health, the steering group is comprised of representatives from the  
4 160 Nicolae Testemitanu State University of Medicine and Pharmacy and the National Public Health  
5 161 Agency. The national steering group is supported by an international team of experts coordinated  
6 162 jointly by the WHO Regional Office for Europe and WHO Country Office in the Republic of  
7 163 Moldova.  
8 164

## 10 165 **AIM AND OBJECTIVES**

### 11 166 **Aim**

12 167  
13 168 The aim of the evaluation is to determine the feasibility of implementing and evaluating essential  
14 169 interventions for the prevention of cardiovascular disease in primary health care in MDA, with a  
15 170 view toward national scale-up.  
16 171

### 17 172 **Objectives**

#### 18 173 Primary Objectives

- 19 174 1. Assess the ability to implement MDA-adapted WHO PEN protocols one and two in pilot  
20 175 primary health care centres
- 21 176 2. Determine the feasibility of collecting quantitative data required for future studies of  
22 177 effectiveness from the existing informal paper clinical record system  
23 178

#### 24 179 Secondary Objectives

- 25 180 1. Determine the baseline performance of primary health care services with respect to  
26 181 essential interventions for the prevention and management of CVD
- 27 182 2. Estimate the change in performance of pilot primary health care centres after 12 months  
28 183 of protocol implementation and compare this to control clinics using usual care  
29 184

## 30 185 **METHODS AND ANALYSIS**

### 31 186 **Overview of Process and Design**

32 187  
33 188 An overview of the methods used to adapt, pilot, and evaluate essential interventions for CVD in  
34 189 primary health care in MDA are summarized by the following seven steps, which are planned to  
35 190 occur from September 2016 to May 2019.  
36 191

#### 37 192 Step One: Adaptation of WHO PEN Protocols to the National Context

38 193 Under the direction of the national steering group, WHO PEN protocols one and two will be  
39 194 compared and contrasted to national disease specific guidelines. The WHO PEN protocols will  
40 195 then be adapted to ensure consistency with the organization, culture, and availability of resources  
41 196 of the health system, while ensuring that they remain simple clinical decision support tools.  
42 197

#### 43 198 Step Two: Development of a Training Package for Primary Health Care Workers

44 199 A three-day training package will be developed under the direction of the national steering group  
45 200 in order to provide in-person theoretical and practical training to nurses and doctors working in  
46 201 primary health care. This will include lectures, clinical case studies, and practical exercises that  
47 202 embrace the experience and knowledge of participants.  
48 203

#### 49 204 Step Three: Collection of Baseline Data



205 According to the Ministry of Health process, a list of 20 primary health care clinics will be  
206 nominated and provided to the working group. They will then be randomized into an intervention  
207 group arm (n=10) and control arm (n=10). Data for quantitative indicators will be extracted from  
208 all 20 clinics by randomly sampling individual paper-based patient records from all primary health  
209 care units using a standardized data collection instrument. This will be done before randomization  
210 by a specially trained group of postgraduate medical trainees, such that neither the clinics nor the  
211 data extractors will know the allocation of each clinic to intervention or control arm.

#### 212 213 Step Four: Training Staff in Pilot Clinics

214 All doctors and nurses from the primary health care centres in the intervention arm will be invited  
215 to be trained together by a national team of experts in groups of approximately 30. It is estimated  
216 that up to 200 health workers will be trained in total. At the end of training each PHC team will  
217 pass through evaluation at the University Centre for Simulation in Medical Training using  
218 objective structured clinical exams and get feedback from trainers and peers.

#### 219 220 Step Five: Implementation of Protocols

221 Trained participants from the ten primary health care clinics in the intervention arm will then be  
222 free to implement the clinical protocols and change their clinical practice, without incentives, for  
223 12 months. During this time, a team of national experts will be created to offer support (distance  
224 and on-the-job) to the primary health care centres in the intervention arm. All ten clinics in the  
225 intervention arm will receive at least one in-person follow-up support visit.

#### 226 227 Step Six: Collection of Follow-up Data

228 After 12 months, using the same method and data collection instruments used to collect baseline  
229 quantitative data (Step Three), data will again be extracted from randomly selected individual  
230 paper-based patient records from all 20 health care centres. Five primary health care centres from  
231 the intervention arm will be selected by the national steering group for one-on-one semi structured  
232 interviews with health staff. This will be supplemented by inviting a selection of staff from all ten  
233 health centres in the intervention arm to participate in focus groups. Together, these qualitative  
234 data will be analysed thematically for explanatory themes.

#### 235 236 Step Seven: Evaluation of Results and Sharing Experience

237 The findings of the quantitative and qualitative analyses will be integrated in a final report and  
238 shared with key stakeholders, including health staff from the participating primary health care  
239 centres. The results will also be shared at a national conference and in an open-access peer  
240 reviewed journal, in order to inform the future development of primary health care capacity in  
241 MDA.

#### 242 243 **Methodological Design**

244 A pragmatic, sequential mixed methods explanatory design, composed of quantitative and  
245 qualitative strands of equal weight, will be used (Figure 1). This design was chosen because it  
246 allows for the use of qualitative data to enlighten and explain the quantitative findings, including  
247 but not limited to the feasibility of collecting data from paper-based records, the contextual factors  
248 affecting guideline implementation, changes in clinical practice, and optimization for the future.

249  
250 **Figure 1.** Illustration using the GATE frame structure (14) of the mixed methods evaluation design

251  
252 A sample size of 20 primary health care centres was chosen because it was seen as a good balance  
253 of allowing for variation in clinic geography and demography, while still remaining feasible for  
254 the pilot implementation. Half of the centres (n=10) will be randomly allocated to the intervention  
255 arm and half (n=10) to the control arm. Baseline data will be collected from both intervention and  
256 control clinics, ensuring that baseline data is collected before implementation occurs.

257  
258 Within clinic comparisons will be used to compare the 12 months before randomization with the  
259 12 months of implementation. Between clinics comparison will be used to compare the  
260 intervention clinics with control clinics during the same time period.

### 261 262 **Eligibility Criteria for Primary Health Care Centres**

263 Health facilities will be nominated by the Ministry of Health for participation based on the  
264 following eligibility criteria: (1) primary health care facilities must be operating in the public sector  
265 as legal entities; (2) primary health care facilities must be sampled in a way such that they are  
266 geographically distributed evenly across the country; equally from the Central, North and Southern  
267 regions of MDA; and (3) health facilities must be primary health care centres that are managed by  
268 family doctors with no specialist doctors working in the facility. These criteria were chosen in  
269 order to select a group of clinics that sufficiently reflect the majority of primary health care  
270 facilities in Moldova.

### 271 272 **Randomization**

273 The clinics will be stratified based on the ratio of patients to family doctors to minimize possible  
274 confounding by doctor caseload, and then randomized electronically into two groups of 10 primary  
275 health care centres.

### 276 277 **Comparison**

278 The 10 primary health care centres in the intervention arm will be compared to the 10 primary  
279 health care centres in the control arm. The control arm will receive no intervention and proceed  
280 with usual care.

### 281 282 **Quantitative Indicators**

283 Indicators were developed to balance input and process indicators, such as measurement of risk  
284 factors and calculation of risk scores, with output (e.g. prescribing) and outcome (e.g. blood  
285 pressure control) indicators. While one of the objectives of this evaluation is to determine the  
286 ability to measure these indicators based on routine paper records, we used our existing knowledge  
287 of the health system to design indicators which were valuable and likely to be feasible to calculate.  
288 Table 1 shows the indicator, the question the indicator seeks to answer, and the respective  
289 numerator and denominator definitions which will be used in the calculations.

290  
291 **Table 1.** Indicators, their numerators and denominators, and questions the indicators answer

### 292 293 **Data Collection and Management**

#### 294 295 Quantitative Data Collection Tool

1  
2  
3 296 A standardized data collection template has been developed for extracting anonymized patient data  
4 297 from individual paper records (Table 2). An online version was also made to allow for data entry  
5 298 on a computer or smartphone. It is estimated to take 15 minutes to extract data from one patient  
6 299 record since the records are made of blank paper with no formal structure or organization of health  
7 300 data.  
8 301

9 302 **Table 2.** Standardized data collection form used to extract data from individual patient records  
10 303

#### 11 304 Method of Randomly Sampling Patient Records

12 305 A random sample of the records of patients aged over 18, who have visited the medical facility  
13 306 within the past 12 months, will be taken. Since medical records in MDA are organized  
14 307 alphabetically on shelves, we created a randomly generated list of alphanumeric combinations that  
15 308 allowed for the selection of patient charts at random. For example, an alphanumeric code of “C24”  
16 309 would correspond to the 24<sup>th</sup> patient chart in the section of last names starting with the letter C.  
17 310

18 311 The list will be followed in the order that it was generated so as to prevent selection bias. The  
19 312 randomly selected chart will then be checked to see if it meets two inclusion criteria: (1) the patient  
20 313 is aged 18 years or older and (2) the patient visited the health centre within the last 12 months. If  
21 314 the record meets these criteria, data will then be extracted. If it does not, it will be returned to the  
22 315 shelf and the next alphanumeric code on the randomly generated list will be used. This process  
23 316 will be repeated in each clinic until a sample size of 1.2% of the patient population in each clinic  
24 317 is sampled. This proportion was chosen pragmatically such that the average sample per primary  
25 318 health care centre would equal 100 unique patients.  
26 319

#### 27 320 Data Analysis

28 321 The change in indicators from baseline to follow-up will be calculated for intervention clinics  
29 322 and compared with control clinics (Table 1). Subgroup analysis by age, gender, and other  
30 323 demographic features may be done as deemed appropriate by the national steering committee.  
31 324 All analyses will account for stratified sampling. Since the health centre is the unit of inference  
32 325 for the outcomes (e.g. health centre proportion of eligible patients with a documented CVD risk  
33 326 score), use of an intraclass correlation coefficient is not required for analyses of these  
34 327 outcomes. Age and gender adjusted logistic regression models will be used to analyse the  
35 328 differences in pre-defined indicators between intervention and control clinics and between  
36 329 baseline and follow-up. The differences in means of continuous variables between the  
37 330 intervention and control clinics and baseline and follow-up will be analysed using age and  
38 331 gender adjusted analysis of variance.  
39 332

#### 40 333 Qualitative Data Collection

##### 41 334 **Follow-up Support Visits**

42 335 Follow-up visits will be made to each intervention clinic at least once during the implementation  
43 336 timeframe (12 months) to provide ad hoc implementation support. These visits will be conducted  
44 337 by members of the national steering group, who will keep field notes about each visit and provide  
45 338 feedback and support to the health centres. The perspectives gained through follow-up support  
46 339 visits will be used by the national steering group to develop preliminary data collection tools for  
47 340 semi-structured interviews.  
48  
49  
50  
51  
52  
53  
54  
55  
56  
57  
58  
59

### 341 **Semi-Structured Interviews**

342 A maximum variation sample of half of the intervention clinics (n=5) will be chosen, based on the  
343 perceived performance of each clinic by the evaluation steering committee. A pragmatic sample  
344 of clinic managers (n=1 per clinic), doctors (n=3 per clinic), and nurses (n=3 per clinic) will be  
345 interviewed one-on-one, using a semi-structured format. Interviews will proceed until data  
346 saturation has been reached, to a maximum of 30 interviews. After obtaining written, informed  
347 consent, interviews will be of 30 to 60 minutes in length, audio recorded, and be transcribed  
348 verbatim and analysed thematically using framework thematic analysis.(15) The interviews will  
349 be conducted by members of the steering group, but the interviewers will be allocated to  
350 participants from health centres with whom they did not provide follow-up support visits.

### 351 **Focus Group Workshop**

352 Participants from all ten implementation clinics will be invited to a workshop to further collect  
353 explanatory qualitative data and to critically reflect on the implementation process. Participants  
354 will be a mix of doctors, nurses, and managers from the intervention clinics.

356 Participants will be placed into small groups based on their profession, and asked to complete a  
357 standardized worksheet. Each group will be under the guidance of a facilitator, and emergent  
358 themes from one-one-one interviews will be used as prompts to each group. The worksheet will  
359 allow for each group to directly comment, modify, or add to the emergent themes, create new  
360 themes, and organize themes into categories such as barriers and facilitators.

### 362 Integration of Quantitative and Qualitative Strands

363 The resulting qualitative data will be analysed thematically using the framework approach, and  
364 used to help explain the findings of the quantitative strand.(15) Following the sequential mixed  
365 method design, integration of the qualitative findings with quantitative findings will allow for the  
366 interpretation of the results in light of each other. This may include post-hoc analysis of  
367 effectiveness of some of the quantitative outcomes as appropriate, to further add meaning to the  
368 integration of qualitative and quantitative strands.

### 369 **Patient and Public Involvement**

370 Neither patients nor the public were involved in the methodological design.

## 373 **ETHICS AND DISSEMINATION**

### 374 **Ethical Review and Approval**

375 This project was reviewed by the Research Ethics Committee of the Nicolae Testemitanu State  
376 University of Medicine and Pharmacy of the Republic of Moldova and granted permission on 31  
377 May 2017.

### 379 **Dissemination**

380 Quantitative findings will be summarized and presented back to all intervention clinics during  
381 follow-up workshops. A comprehensive project report will be written and shared with key  
382 stakeholders. A final report of key findings of the evaluation will be written and submitted to an  
383 open access peer-reviewed journal and made available to all study participants so they can use the  
384 findings to improve their practice. The findings will be used to evaluate the feasibility of a national  
385 scale-up of essential NCD interventions in primary health care in MDA.

1  
2  
3 386  
4 387  
5  
6 388  
7 389  
8 390  
9 391  
10 392  
11 393  
12 394  
13 395  
14 396  
15 397  
16 398  
17 399  
18 400  
19 401  
20 402  
21 403  
22 404  
23 405  
24 406  
25 407  
26 408  
27 409  
28 410  
29 411  
30 412  
31 413  
32 414  
33 415  
34 416  
35 417  
36 418  
37 419  
38 420  
39 421  
40 422  
41 423  
42 424  
43 425  
44 426  
45 427  
46 428  
47 429  
48 430  
49 431  
50  
51  
52  
53  
54  
55  
56  
57  
58  
59  
60

## REFERENCES

1. Benziger CP, Roth GA, Moran AE. The Global Burden of Disease Study and the Preventable Burden of NCD. *Glob Heart*. 2016 Dec;11(4):393–7.
2. World Health Organization (WHO). World Health Statistics [Internet]. 2018. Available from: [http://www.who.int/gho/publications/world\\_health\\_statistics/2018/en/](http://www.who.int/gho/publications/world_health_statistics/2018/en/)
3. World Health Organization (WHO). Package of Essential Noncommunicable (PEN) disease interventions for primary health care in low-resource settings [Internet]. 2013. Available from: [http://www.who.int/ncds/management/pen\\_tools/en/](http://www.who.int/ncds/management/pen_tools/en/)
4. World Health Organization (WHO). Global action plan for the prevention and control of NCDs 2013-2020. 2013.
5. Organization WH. Tackling NCDs: “Best buys” and other recommended interventions for the prevention and control of noncommunicable diseases [Internet]. 2017. Available from: <http://www.who.int/ncds/management/best-buys/en/>
6. World Health Organization (WHO). Evaluation of the structure and provision of primary care in the Republic of Moldova. 2012.
7. National Center for Health Management. Health Yearbook: Public Health in Moldova [Internet]. 2015. Available from: <http://www.cnms.md/ro/rapoarteo>
8. World Health Organization. Global Health Observatory data repository [Internet]. [cited 2018 Jul 10]. Available from: <http://apps.who.int/gho/data/node.home>
9. World Health Organization (WHO). Prevalence of Noncommunicable Disease Risk Factors in the Republic of Moldova (STEPS) [Internet]. 2014. Available from: [http://www.who.int/ncds/surveillance/steps/Moldova\\_2013\\_STEPS\\_Report.pdf](http://www.who.int/ncds/surveillance/steps/Moldova_2013_STEPS_Report.pdf)
10. Turcanu C, Domente S, Buga M, Richardson E. Health Systems in Transition: Republic of Moldova [Internet]. 2012. Available from: [http://www.euro.who.int/\\_\\_data/assets/pdf\\_file/0006/178053/HiT-Moldova.pdf](http://www.euro.who.int/__data/assets/pdf_file/0006/178053/HiT-Moldova.pdf)
11. World Health Organization (WHO). Ambulatory care sensitive conditions in the Republic of Moldova [Internet]. 2015. Available from: <http://www.euro.who.int/en/countries/republic-of-moldova/publications/ambulatory-care-sensitive-conditions-in-the-republic-of-moldova-2015>
12. Government of the Republic of Moldova. Action Program of the Government of the Republic of Moldova 2016–2018 [Internet]. 2016. Available from: [http://gov.md/sites/default/files/document/attachments/guvernul\\_republicii\\_moldova\\_-\\_programul\\_de\\_activitate\\_al\\_guvernului\\_republicii\\_moldova\\_2016-2018.pdf](http://gov.md/sites/default/files/document/attachments/guvernul_republicii_moldova_-_programul_de_activitate_al_guvernului_republicii_moldova_2016-2018.pdf)
13. World Health Organization Regional Office for Europe. Better noncommunicable disease outcomes: challenges and opportunities for health systems -- Country Assessment of Republic of Moldova [Internet]. Copenhagen; 2014. Available from: [http://www.euro.who.int/\\_\\_data/assets/pdf\\_file/0008/255464/BetterNCDoutcomesChallengesOpportunitiesHealthSystemsMoldovaCountryAssessmentEng.pdf?ua=1](http://www.euro.who.int/__data/assets/pdf_file/0008/255464/BetterNCDoutcomesChallengesOpportunitiesHealthSystemsMoldovaCountryAssessmentEng.pdf?ua=1)
14. Jackson R, Ameratunga S, Broad J, Connor J, Lethaby A, Robb G, et al. The GATE frame: critical appraisal with pictures. Vol. 144, ACP journal club. United States; 2006. p. A8-11.
15. Gale NK, Heath G, Cameron E, Rashid S, Redwood S. Using the framework method for the analysis of qualitative data in multi-disciplinary health research. *BMC Med Res Methodol*. 2013 Sep;13:117.

1  
2  
3 432 **AUTHORS AND CONTRIBUTIONS**

4 433 DC, AC, TL, GC, VS, TZ, AA, and JF contributed to the methodological design. DC, AC, TL, and  
5 434 JF contributed to writing the manuscript.

6 435

7  
8 436 **FUNDING STATEMENT**

9 437 This study is funded jointly by the Swiss Agency for Development and Cooperation (SDC) and WHO  
10 438 Regional Office for Europe.

11 439

12 440 **COMPETING INTERESTS STATEMENT**

13 441 DC, AC, TL, GC, VS, TZ, AA, JF declare no competing interests.

14 442  
15  
16  
17  
18  
19  
20  
21  
22  
23  
24  
25  
26  
27  
28  
29  
30  
31  
32  
33  
34  
35  
36  
37  
38  
39  
40  
41  
42  
43  
44  
45  
46  
47  
48  
49  
50  
51  
52  
53  
54  
55  
56  
57  
58  
59  
60

443 **Table 1.** Indicators, their numerators and denominators, and questions the indicators answer

| Question                                                                                                                         | Indicator                                                                                                                                                                                                                                            | Numerator                                                                                                                                                                                                                                                                                                                                                                                                                                                                  | Denominator                                                                                                                                                                                                                                                                                                                                                                                                                                           |
|----------------------------------------------------------------------------------------------------------------------------------|------------------------------------------------------------------------------------------------------------------------------------------------------------------------------------------------------------------------------------------------------|----------------------------------------------------------------------------------------------------------------------------------------------------------------------------------------------------------------------------------------------------------------------------------------------------------------------------------------------------------------------------------------------------------------------------------------------------------------------------|-------------------------------------------------------------------------------------------------------------------------------------------------------------------------------------------------------------------------------------------------------------------------------------------------------------------------------------------------------------------------------------------------------------------------------------------------------|
| Are risk factors being measured?                                                                                                 | Proportion of eligible patients who have all risk factor values recorded as required for calculation of risk score                                                                                                                                   | Patients aged 40 or older who have visited in the last 12 months who have all measurements required for calculation of risk score within 12 months of the most recent date of visit                                                                                                                                                                                                                                                                                        | Patients aged 40 or older who have visited in the last 12 months                                                                                                                                                                                                                                                                                                                                                                                      |
| Are risk factor measurements being converted to a total risk score?                                                              | Proportion of patients aged 40 or older who have visited in the last 12 months who have all measurements required for calculation of risk score within 12 months of the most recent date of visit, that have a documented risk score                 | Patients aged 40 or older who have visited in the last 12 months who have all measurements required for calculation of risk score within 12 months of the most recent date of visit, that have a documented risk score                                                                                                                                                                                                                                                     | Patients aged 40 or older who have visited in the last 12 months who have all measurements required for calculation of risk score within 12 months of the most recent date of visit                                                                                                                                                                                                                                                                   |
| Are risk scores calculated correctly?                                                                                            | Proportion of patients aged 40 or older who have visited in the last 12 months who have all measurements required for calculation of risk score within 12 months of the most recent date of visit, that have a documented risk score that is correct | Patients aged 40 or older who have visited in the last 12 months who have all measurements required for calculation of risk score within 12 months of the most recent date of visit, that have a documented risk score that is correct                                                                                                                                                                                                                                     | Patients aged 40 or older who have visited in the last 12 months who have all measurements required for calculation of risk score within 12 months of the most recent date of visit, that have a documented risk score                                                                                                                                                                                                                                |
| Are patients being risk scored?                                                                                                  | Proportion of eligible patients with a documented risk score                                                                                                                                                                                         | Patients aged 40 or older who have visited in the last 12 months with a documented risk score                                                                                                                                                                                                                                                                                                                                                                              | Patients aged 40 or older who have visited in the last 12 months                                                                                                                                                                                                                                                                                                                                                                                      |
| Are risk scores calculated correctly?                                                                                            | Proportion of eligible patients with a documented risk score that is correct                                                                                                                                                                         | Patients aged 40 or older who have visited in the last 12 months with a documented risk score that is correct                                                                                                                                                                                                                                                                                                                                                              | Patients aged 40 or older who have visited in the last 12 months with a documented risk score                                                                                                                                                                                                                                                                                                                                                         |
| Are statins prescribed to the correct patients?                                                                                  | Proportion of eligible patients prescribed a statin                                                                                                                                                                                                  | Patients with existing CVD, diabetics 40 or older with high LDL values (as defined based on total CVD risk of SCORE 10-14% in LDL $\geq$ 2.6 mmol/L; with very high risk SCORE $\geq$ 15% in LDL $\geq$ 1.8 mmol/L), or patients with a SCORE of $\leq$ 9% and LDL $\geq$ 2.6 or total cholesterol $\geq$ 7.2, or patients with a SCORE of 10-14% and a LDL $\geq$ 1.8 or total cholesterol $\geq$ 7.2 mmol/L, or patients with a SCORE of $\geq$ 15%, prescribed a statin | Patients with existing CVD, diabetics 40 or older with high LDL values (as defined based on total CVD risk of SCORE 10-14% in LDL $\geq$ 2.6 mmol/L; with very high risk SCORE $\geq$ 15% in LDL $\geq$ 1.8 mmol/L), or patients with a SCORE of $\leq$ 9% and LDL $\geq$ 2.6 or total cholesterol $\geq$ 7.2, or patients with a SCORE of 10-14% and a LDL $\geq$ 1.8 or total cholesterol $\geq$ 7.2 mmol/L, or patients with a SCORE of $\geq$ 15% |
| Are statins prescribed correctly based on documented risk score?                                                                 | Proportion of patients eligible based on documented risk score prescribed a statin                                                                                                                                                                   | Patients with a documented risk score as very high risk SCORE $\geq$ 15% prescribed a statin                                                                                                                                                                                                                                                                                                                                                                               | Patients with a documented risk score as very high risk SCORE $\geq$ 15%                                                                                                                                                                                                                                                                                                                                                                              |
| Are patients with existing disease, who do not require the calculation of a risk score to prescribe statins, prescribed statins? | Proportion of patients with existing CVD prescribed a statin                                                                                                                                                                                         | Patients with existing CVD prescribed a statin                                                                                                                                                                                                                                                                                                                                                                                                                             | Patients with existing CVD                                                                                                                                                                                                                                                                                                                                                                                                                            |

|                                                                             |                                                                                                                                                 |                                                                                                                                                                     |                                                                                                      |
|-----------------------------------------------------------------------------|-------------------------------------------------------------------------------------------------------------------------------------------------|---------------------------------------------------------------------------------------------------------------------------------------------------------------------|------------------------------------------------------------------------------------------------------|
| Is the blood pressure of high risk patients controlled?                     | Proportion of high risk patients (SCORE $\geq$ 15% or DM and age over 40) whose last two recorded blood pressure measurements were <130/80 mmHg | Patients with a true risk score indicating a very high risk (SCORE $\geq$ 15%) or DM and age over 40 whose last two documented blood pressure readings were <130/80 | Patients with a true risk score indicating a very high risk (SCORE $\geq$ 15%) or DM and age over 40 |
| Is the blood pressure of lower risk patients controlled?                    | Proportion of lower risk patients (SCORE <15%) whose last two recorded blood pressure measurements were <140/90 mmHg                            | Patients with a true risk score indicating <15% whose last two documented blood pressure readings were <140/90                                                      | Patients with a true risk score indicating <15%                                                      |
| Are patients with existing CVD prescribed basic medications to reduce risk? | Proportion of patients with existing CVD prescribed a statin and aspirin and blood pressure lowering treatment                                  | Patients with existing CVD prescribed a statin and aspirin and blood pressure lowering treatment                                                                    | Patients with existing CVD                                                                           |
| Is the blood glucose of diabetic patients controlled?                       | Proportion of diabetic patients with glycaemic control as defined by last two HbA1c measurements                                                | Patients with diabetes 2 whose last two HbA1c measurements were below personal target as defined by MDA adapted WHO PEN 1                                           | Patients with diabetes type 2                                                                        |
| Is the blood pressure of hypertensive patients controlled?                  | Proportion of confirmed hypertensive patients whose SBP is <140/90 at last two visits                                                           | Patients with confirmed hypertension whose last two blood pressure readings were <140/90                                                                            | Patients with confirmed hypertension                                                                 |
| What is the prevalence of high blood pressure?                              | Proportion of people whose last two systolic blood pressure reading are 140 mmHg or above                                                       | Patients whose last two systolic blood pressure readings were $\geq$ 140                                                                                            | All patients over 18                                                                                 |

444  
445  
446



447 **Table 2.** Standardized data collection form used to extract data from individual patient records  
448

| <b>Data Collection Question</b>                                                                               | <b>Answer</b> |
|---------------------------------------------------------------------------------------------------------------|---------------|
| What is your name? (Name of person extracting data)                                                           |               |
| Date of Data Extraction (MM-DD-YYYY)                                                                          |               |
| Write the Clinic Name                                                                                         |               |
| Is this a duplicate extraction?                                                                               |               |
| If it is a duplicate extraction, enter the number you and your extraction partner have assigned to this file. |               |
| Date of Birth (MM-DD-YYYY)                                                                                    |               |
| Sex (M/F)                                                                                                     |               |
| Smoking Status (Y/M)                                                                                          |               |
| Diagnosis of Hypertension (Y/N)                                                                               |               |
| Date of Hypertension Diagnosis (MM-DD-YYYY)                                                                   |               |
| Can you find one or more blood pressure readings? (Y/N)                                                       |               |
| Most Recent Systolic Blood Pressure                                                                           |               |
| Most Recent Diastolic Blood Pressure                                                                          |               |
| Date of the Most Recent Blood Pressure Measurement (MM-DD-YYYY)                                               |               |
| Can you find a second most recent blood pressure reading? (Y/N)                                               |               |
| Second most recent systolic blood pressure                                                                    |               |
| Second most recent diastolic blood pressure                                                                   |               |
| Date of the second most recent systolic blood pressure (MM-DD-YYYY)                                           |               |
| Diagnosis of Diabetes (Type 1, Type 2, No)                                                                    |               |
| Can you find one or more HbA1c measurements? (Y/N)                                                            |               |
| Most recent HbA1c reading (mmol/mol)                                                                          |               |
| Date of the most recent HbA1c measurement? (MM-DD-YYYY)                                                       |               |
| Can you find another HbA1c measurement? (Y/N)                                                                 |               |
| Second most recent HbA1c reading (mmol/mol, otherwise specify unit)                                           |               |
| Date of the second most recent HbA1c reading? (MM-DD-YYYY)                                                    |               |
| Can you find one or more total cholesterol measurements? (Y/N)                                                |               |
| Most recent total cholesterol reading (mmol/L)                                                                |               |
| Date of the most recent cholesterol reading (MM-DD-YYYY)                                                      |               |
| Can you find another cholesterol measurement? (Y/N)                                                           |               |
| Second most recent cholesterol reading (mmol/L)                                                               |               |
| Date of the second most recent cholesterol reading (MM-DD-YYYY)                                               |               |
| Was the patient prescribed a statin? (Y/N)                                                                    |               |
| What was the date of the statin prescription? (MM-DD-YYYY)                                                    |               |

|    |                                                                                                                                                                                                                                          |
|----|------------------------------------------------------------------------------------------------------------------------------------------------------------------------------------------------------------------------------------------|
| 1  |                                                                                                                                                                                                                                          |
| 2  |                                                                                                                                                                                                                                          |
| 3  | What was the drug and dose?                                                                                                                                                                                                              |
| 4  | Does the patient have existing CVD? (Y/N)                                                                                                                                                                                                |
| 5  | State the type of CVD                                                                                                                                                                                                                    |
| 6  | Has the patient been prescribed acetylsalicylic acid (ASA or aspirin)? (Y/N)                                                                                                                                                             |
| 7  | What was the most recent date that ASA was prescribed? (MM-DD-YYYY)                                                                                                                                                                      |
| 8  | Has the patient been prescribed anti-hypertensives? (Y/N)                                                                                                                                                                                |
| 9  | What was the most recent date that anti-hypertensives were prescribed? (MM-DD-YYYY)                                                                                                                                                      |
| 10 | Can you find a documented ESC SCORE risk score? (Y/N)                                                                                                                                                                                    |
| 11 | Enter the most recent documented ESC SCORE risk score (%)                                                                                                                                                                                |
| 12 | What was the date the risk score was documented? (MM-DD-YYYY)                                                                                                                                                                            |
| 13 | Please record any important notes about the data extraction here. Examples include an error you think may have been made, clarification of the units for measurements (e.g. mmol/L vs mg/dL). Or notes that you would like for yourself. |
| 14 |                                                                                                                                                                                                                                          |
| 15 |                                                                                                                                                                                                                                          |
| 16 |                                                                                                                                                                                                                                          |
| 17 |                                                                                                                                                                                                                                          |
| 18 |                                                                                                                                                                                                                                          |
| 19 |                                                                                                                                                                                                                                          |
| 20 |                                                                                                                                                                                                                                          |
| 21 |                                                                                                                                                                                                                                          |
| 22 |                                                                                                                                                                                                                                          |
| 23 |                                                                                                                                                                                                                                          |
| 24 |                                                                                                                                                                                                                                          |
| 25 |                                                                                                                                                                                                                                          |
| 26 |                                                                                                                                                                                                                                          |
| 27 |                                                                                                                                                                                                                                          |
| 28 |                                                                                                                                                                                                                                          |
| 29 |                                                                                                                                                                                                                                          |
| 30 |                                                                                                                                                                                                                                          |
| 31 |                                                                                                                                                                                                                                          |
| 32 |                                                                                                                                                                                                                                          |
| 33 |                                                                                                                                                                                                                                          |
| 34 |                                                                                                                                                                                                                                          |
| 35 |                                                                                                                                                                                                                                          |
| 36 |                                                                                                                                                                                                                                          |
| 37 |                                                                                                                                                                                                                                          |
| 38 |                                                                                                                                                                                                                                          |
| 39 |                                                                                                                                                                                                                                          |
| 40 |                                                                                                                                                                                                                                          |
| 41 |                                                                                                                                                                                                                                          |
| 42 |                                                                                                                                                                                                                                          |
| 43 |                                                                                                                                                                                                                                          |
| 44 |                                                                                                                                                                                                                                          |
| 45 |                                                                                                                                                                                                                                          |
| 46 |                                                                                                                                                                                                                                          |
| 47 |                                                                                                                                                                                                                                          |
| 48 |                                                                                                                                                                                                                                          |
| 49 |                                                                                                                                                                                                                                          |
| 50 |                                                                                                                                                                                                                                          |
| 51 |                                                                                                                                                                                                                                          |
| 52 |                                                                                                                                                                                                                                          |
| 53 |                                                                                                                                                                                                                                          |
| 54 |                                                                                                                                                                                                                                          |
| 55 |                                                                                                                                                                                                                                          |
| 56 |                                                                                                                                                                                                                                          |
| 57 |                                                                                                                                                                                                                                          |
| 58 |                                                                                                                                                                                                                                          |
| 59 |                                                                                                                                                                                                                                          |
| 60 |                                                                                                                                                                                                                                          |

449

1  
2  
3  
4  
5  
6  
7  
8  
9  
10  
11  
12  
13  
14  
15  
16  
17  
18  
19  
20  
21  
22  
23  
24  
25  
26  
27  
28  
29  
30  
31  
32  
33  
34  
35  
36  
37  
38  
39  
40  
41  
42  
43  
44  
45  
46  
47  
48  
49  
50  
51  
52  
53  
54  
55  
56  
57  
58  
59  
60



Figure 1. Illustration using the GATE frame structure (14) of the mixed methods evaluation design

184x193mm (300 x 300 DPI)
